# Supplementary material
Source: PubMed Central journal article supplement (PMC5019760)
Supplement: supp_JCO.2016.67.1412_DS_2016.671412.pdf [file supp_JCO.2016.67.1412_DS_2016.671412.pdf]

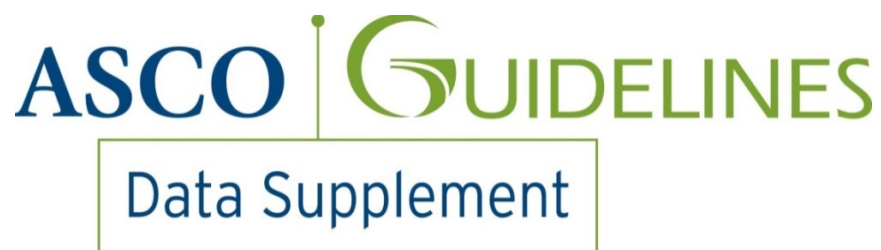

**Metastatic Pancreatic Cancer: American Society of Clinical Oncology Clinical Practice Guideline**

**Table of Contents**

Data Supplement 1:

Table 1: Patient and Disease Characteristics

Table 2: Outcomes and Adverse Events

Data Supplement 2: Systematic Review and Meta-analysis

Data Supplement 3: Literature Search Strategy

Data Supplement 4: QUOROM Diagram

Data Supplement 5: World Health Organization – Definition of Palliative Care

Data Supplement 6: Pancreatic Protocol Computerized Tomography (CT)

:

**Table 1: Patient and Disease Characteristics**

| Author<br>Year<br>Reference         | Interventions<br>[or]<br>Comparisons  | # of Pts | Patient Characteristics |      |        |                                                                                                           | Disease Characteristics                                                           |                                                                                                                                                                        |                                                                                |  |
|-------------------------------------|---------------------------------------|----------|-------------------------|------|--------|-----------------------------------------------------------------------------------------------------------|-----------------------------------------------------------------------------------|------------------------------------------------------------------------------------------------------------------------------------------------------------------------|--------------------------------------------------------------------------------|--|
|                                     |                                       |          | Median<br>Age           | Sex  |        | Perform-<br>ance<br>Status                                                                                | Location                                                                          | Markers                                                                                                                                                                | Previous<br>Treatment                                                          |  |
|                                     |                                       |          |                         | Male | Female |                                                                                                           |                                                                                   |                                                                                                                                                                        |                                                                                |  |
| Oettle et al.,<br>2014<br>CONKO-003 | OFF                                   | 76       | 62                      | 40   | 36     | Karnofsky<br>70-80: 35<br>90-100: 41                                                                      | NR                                                                                | NR                                                                                                                                                                     | NR                                                                             |  |
|                                     | FF                                    | 84       | 61                      | 48   | 36     | Karnofsky<br>70-80: 44<br>90-100: 40                                                                      |                                                                                   |                                                                                                                                                                        |                                                                                |  |
| Von Hoff et<br>al., 2013            | nab-Paclitaxel<br>plus<br>Gemcitabine | 431      | 62                      | 245  | 186    | Karnofsky<br>100: 69<br>(16%)<br>90: 179<br>(42%)<br>80: 149<br>(35%)<br>70: 30<br>(7%)<br>60: 2<br>(<1%) | Head: 191<br>(44%)<br>Body: 132<br>(31%)<br>Tail: 105 (24%)<br>Unknown: 3<br>(1%) | Level of CA<br>19-9<br>Normal: 60<br>(16%)<br>ULN to<br><59x ULN:<br>122 (32%)<br>>/= 59x<br>ULN: 197<br>(52%)<br><br>CA 19-9<br>U/ml:<br>2293.7<br>range 1.9-<br>6159 | Chemo: 23 (5%)<br>Radiation: 19 (4%)<br>Whipple: 32<br>(7%)<br>Stent: 80 (19%) |  |

| Author<br>Year<br>Reference | Interventions<br>[or]<br>Comparisons | # of Pts | Patient Characteristics |      |        |                                                                                                       | Disease Characteristics                                                           |                                                                                                                                                              |                                                                                   |  |
|-----------------------------|--------------------------------------|----------|-------------------------|------|--------|-------------------------------------------------------------------------------------------------------|-----------------------------------------------------------------------------------|--------------------------------------------------------------------------------------------------------------------------------------------------------------|-----------------------------------------------------------------------------------|--|
|                             |                                      |          | Median<br>Age           | Sex  |        | Perform-<br>ance<br>Status                                                                            | Location                                                                          | Markers                                                                                                                                                      | Previous<br>Treatment                                                             |  |
|                             |                                      |          |                         | Male | Female |                                                                                                       |                                                                                   |                                                                                                                                                              |                                                                                   |  |
|                             | Gemcitabine<br>alone                 | 430      | 63                      | 257  | 173    | Karnofsky<br>100: 69<br>(16%)<br>90: 199<br>(46%)<br>80: 128<br>(30%)<br>70: 33<br>(8%)<br>60: 0 (0%) | Head: 180<br>(42%)<br>Body: 136<br>(32%)<br>Tail: 110 (26%)<br>Unknown: 4<br>(1%) | Level of CA<br>19-9<br>Normal: 56<br>(15%); ULN<br>to <59x<br>ULN 120<br>(32%); >/=<br>59x ULN<br>195 (53%)<br>CA 19-9<br>U/ml: 2759<br>range 0.3-<br>12,207 | Chemo: 12 (3%)<br>Radiation: 11<br>(3%)<br>Whipple: 30<br>(7%)<br>Stent: 68 (16%) |  |
| Rougier et al.,<br>2013     | Gemcitabine<br>plus placebo          | 275      | 61                      | 157  | 118    | WHO<br>0: 102<br>1: 154<br>2: 19                                                                      | Head: 117<br>Body: 41<br>Tail: 45<br>Entire pancreas:<br>72<br>Other: 0           | NR                                                                                                                                                           | NR                                                                                |  |
|                             | Gemcitabine<br>plus aflibercept      | 271      | 62                      | 160  | 111    | WHO<br>0: 102<br>1: 152<br>2: 17                                                                      | Head: 132<br>Body: 41<br>Tail: 46<br>Entire Pancreas:<br>50<br>Other: 2           |                                                                                                                                                              |                                                                                   |  |

| Author<br>Year<br>Reference      | Interventions<br>[or]<br>Comparisons | # of Pts | Patient Characteristics |      |        |                                           | Disease Characteristics                                    |                                      |                       |  |
|----------------------------------|--------------------------------------|----------|-------------------------|------|--------|-------------------------------------------|------------------------------------------------------------|--------------------------------------|-----------------------|--|
|                                  |                                      |          | Median<br>Age           | Sex  |        | Perform-<br>ance<br>Status                | Location                                                   | Markers                              | Previous<br>Treatment |  |
|                                  |                                      |          |                         | Male | Female |                                           |                                                            |                                      |                       |  |
| Goncalves et al., 2012<br>BAYPAN | Gemcitabine plus placebo             | 52       | 64                      | 32   | 20     | WHO<br>0: 18<br>1: 30<br>2: 3<br>NA: 1    | NR                                                         | CA 19-9<br>Median 424<br>(1.3-3300)  | NR                    |  |
|                                  | Gemcitabine plus sorafenib           | 52       | 61                      | 30   | 22     | WHO<br>0: 16<br>1: 26<br>2: 5<br>NA: 5    |                                                            | CA 19-9<br>Median 471<br>(1.2-21500) |                       |  |
| Conroy et al., 2011              | FOLFIRINOX                           | 171      | 61                      | 106  | 65     | NR                                        | Head: 67<br>Body: 53<br>Tail: 45<br>Multicentric: 6        | NR                                   | Stent: 27             |  |
|                                  | Gemcitabine                          | 171      | 61                      | 105  | 66     |                                           | Head: 64<br>Body: 58<br>Tail: 45<br>Multicentric:<br>5/171 |                                      | Stent: 22             |  |
| Kindler et al., 2011             | axitinib plus gemcitabine            | 314      | 61                      | 191  | 123    | WHO<br>0: 147<br>1: 162<br>Missing:<br>11 | NR                                                         | NR                                   | NR                    |  |
|                                  | placebo plus gemcitabine             | 316      | 62                      | 188  | 128    | WHO<br>0: 158<br>1: 154<br>Missing: 4     |                                                            |                                      |                       |  |

| Author<br>Year<br>Reference                                | Interventions<br>[or]<br>Comparisons                                             | # of Pts | Patient Characteristics |      |        |                                              | Disease Characteristics |         |                                    |
|------------------------------------------------------------|----------------------------------------------------------------------------------|----------|-------------------------|------|--------|----------------------------------------------|-------------------------|---------|------------------------------------|
|                                                            |                                                                                  |          | Median<br>Age           | Sex  |        | Perform-<br>ance<br>Status                   | Location                | Markers | Previous<br>Treatment              |
|                                                            |                                                                                  |          |                         | Male | Female |                                              |                         |         |                                    |
| da Cunha<br>Santos et al.,<br>2010<br><br>NCIC CTG<br>PA.3 | Gemcitabine vs<br>gemcitabine plus<br>erlotinib in<br>KRAS mutant<br>patients    | 92       | 62.2                    | 47   | 45     | WHO<br>0:16<br>1:57<br>2:19<br>Unknown:<br>0 | NR                      | NR      | NR                                 |
|                                                            | Gemcitabine vs<br>gemcitabine plus<br>erlotinib in<br>KRAS wild type<br>patients | 25       | 65.6                    | 17   | 8      | WHO<br>0: 7<br>1: 14<br>2: 3<br>Unknown:1    |                         |         |                                    |
|                                                            | Gemcitabine vs<br>gemcitabine plus<br>erlotinib in<br>EGFR FISH+<br>patients     | 50       | 61.0                    | 32   | 18     | WHO<br>0:11<br>1:24<br>2:14<br>Unknown:1     |                         |         |                                    |
|                                                            | Gemcitabine vs<br>gemcitabine plus<br>erlotinib in<br>EGFR FISH-<br>patients     | 57       | 64.7                    | 30   | 27     | WHO<br>0:12<br>1:35<br>2:10<br>Unknown:0     |                         |         |                                    |
| Moinpour et<br>al., 2010                                   | Gemcitabine                                                                      | 359      | 65                      | 197  | 162    | WHO<br>0-1:312<br>2:47                       | NR                      | NR      | Chemo: 14<br>Pancreatectomy:<br>36 |

| Author<br>Year<br>Reference            | Interventions<br>[or]<br>Comparisons | # of Pts | Patient Characteristics |      |        | Disease Characteristics                                    |                                                                                                                |                                                                          |                                                                                                                                                      |
|----------------------------------------|--------------------------------------|----------|-------------------------|------|--------|------------------------------------------------------------|----------------------------------------------------------------------------------------------------------------|--------------------------------------------------------------------------|------------------------------------------------------------------------------------------------------------------------------------------------------|
|                                        |                                      |          | Median<br>Age           | Sex  |        | Perform-<br>ance<br>Status                                 | Location                                                                                                       | Markers                                                                  | Previous<br>Treatment                                                                                                                                |
|                                        |                                      |          |                         | Male | Female |                                                            |                                                                                                                |                                                                          |                                                                                                                                                      |
|                                        | Gemcitabine<br>plus cetuximab        | 361      | 64                      | 188  | 173    | WHO<br>0-1: 314<br>2: 47                                   |                                                                                                                |                                                                          | Chemo: 21<br>Pancreatectomy:<br>32                                                                                                                   |
| Colucci et al.,<br>2010<br><br>GIP-1   | Gemcitabine                          | 199      | 63                      | 113  | 86     | Karnofsky<br><=70:33<br>>=80: 166                          | Head: 91<br>Body: 52<br>Tail: 26<br>Head + Body:10<br>Body + Tail:18<br>Head + Body +<br>Tail:1<br>Unknown:1   | NR                                                                       | Surgery: 47                                                                                                                                          |
|                                        | Gemcitabine<br>plus Cisplatin        | 201      | 63                      | 125  | 73     | Karnofsky<br><=70:36<br>>=80: 165                          | Head: 101<br>Body: 34<br>Tail: 20<br>Head + Body: 6<br>Body + Tail: 39<br>Head + Body +<br>Tail:1<br>Unknown:0 |                                                                          | Surgery: 56                                                                                                                                          |
| Dahan et al.,<br>2010<br><br>FFCD 0301 | LV5FU2-CDDP                          | 102      | 62                      | 65   | 37     | WHO<br>0: 28<br>1: 51<br>2: 22<br>Not<br>Determined<br>: 1 | Head: 57<br>Other: 44<br>Unknown: 1                                                                            | CEA<br>Median: 9<br>(0-2224)<br><br>CA 19-9<br>Median: 565<br>(0-862200) | Chemo: 0<br>Radiation: 1<br>Resection: 13<br>Drainage: 4<br>Other Surgery: 6<br>Deudenal Stent:<br>10<br>Radiological/end<br>oscopic drainage:<br>22 |
|                                        | Gemcitabine                          | 100      | 65                      | 65   | 35     | WHO<br>0: 30<br>1: 53                                      | Head: 49<br>Other: 50<br>Unknown: 1                                                                            | CEA<br>Median: 7<br>(1-3604)                                             | Chemo: 3<br>Radiation: 2<br>Resection: 14                                                                                                            |

| Author<br>Year<br>Reference         | Interventions<br>[or]<br>Comparisons          | # of Pts | Patient Characteristics |      |        | Disease Characteristics           |                                                                                          |                                                                                   |                                                                                                     |
|-------------------------------------|-----------------------------------------------|----------|-------------------------|------|--------|-----------------------------------|------------------------------------------------------------------------------------------|-----------------------------------------------------------------------------------|-----------------------------------------------------------------------------------------------------|
|                                     |                                               |          | Median<br>Age           | Sex  |        | Perform-<br>ance<br>Status        | Location                                                                                 | Markers                                                                           | Previous<br>Treatment                                                                               |
|                                     |                                               |          |                         | Male | Female |                                   |                                                                                          |                                                                                   |                                                                                                     |
|                                     |                                               |          |                         |      |        | 2: 14<br>Not<br>Determined<br>: 3 |                                                                                          | CA 19-9<br>Median: 560<br>(1-156649)                                              | Drainage: 8<br>Other Surgery: 6<br>Deudenal Stent: 5<br>Radiological/end<br>oscopic drainage:<br>11 |
| Cunningham<br>et al., 2009          | Gemcitabine                                   | 266      | 62                      | 153  | 113    | WHO<br>0: 56<br>1: 161<br>2: 49   | Head: 185<br>Body: 36<br>Tail: 30<br>Head + Body: 7<br>Body + Tail: 7<br>Unknown: 5      | NR                                                                                | NR                                                                                                  |
|                                     | Gemcitabine<br>plus<br>Capecitabine           | 267      | 62                      | 160  | 107    | WHO<br>0: 66<br>1: 149<br>2: 52   | Head: 190<br>Body: 29<br>Tail: 25<br>Head + Body:<br>10<br>Body + Tail: 10<br>Unknown: 4 |                                                                                   |                                                                                                     |
| Van Cutsem<br>et al., 2009          | Gemcitabine-<br>erlotinib plus<br>placebo     | 301      | 61                      | 188  | 113    | NR                                | Head: 165<br>Body: 65<br>Tail: 67                                                        | NR                                                                                | Radiation: 5<br>Antimetabolites:<br>14                                                              |
|                                     | Gemcitabine-<br>erlotinib plus<br>Bevacizumab | 306      | 62                      | 174  | 132    |                                   | Head: 157<br>Body: 79<br>Tail: 68                                                        |                                                                                   | Radiation: 12<br>Antimetabolites:<br>12                                                             |
| Poplin et al.,<br>2009<br><br>E6201 | Gemcitabine                                   | 275      | 64                      | 155  | 120    | NR                                | NR                                                                                       | CA 19-9<br>Median<br>1961 (167-<br>12024)<br><br>CEA<br>Median: 5.7<br>(2.3-30.9) | Chemo: 15<br>Radiation: 21<br>Surgery: 43                                                           |

| Author<br>Year<br>Reference         | Interventions<br>[or]<br>Comparisons       | # of Pts | Patient Characteristics |      |        | Perform-<br>ance<br>Status           | Disease Characteristics                                                           |                                           |                                                                                                       |
|-------------------------------------|--------------------------------------------|----------|-------------------------|------|--------|--------------------------------------|-----------------------------------------------------------------------------------|-------------------------------------------|-------------------------------------------------------------------------------------------------------|
|                                     |                                            |          | Median<br>Age           | Sex  |        |                                      | Location                                                                          | Markers                                   | Previous<br>Treatment                                                                                 |
|                                     |                                            |          |                         | Male | Female |                                      |                                                                                   |                                           |                                                                                                       |
|                                     | Gemcitabine<br>fixed-dose rate<br>infusion | 277      | 61                      | 160  | 117    |                                      | CA 19-9<br>Median:<br>1148 (136-<br>9651)<br><br>CEA<br>Median: 5.9<br>(2.4-30.1) | Chemo: 17<br>Radiation: 23<br>Surgery: 42 |                                                                                                       |
|                                     | Gemcitabine<br>plus oxaliplatin            | 272      | 63                      | 124  | 148    |                                      | CA 19-9<br>Median:<br>1077 (90-<br>9301)<br><br>CEA<br>Median: 6.3<br>(2.4 -35.5) | Chemo: 10<br>Radiation: 21<br>Surgery: 32 |                                                                                                       |
| Bernhard et<br>al., 2008            | Capecitabine<br>plus<br>Gemcitabine        | 160      | 62                      | 86   | 74     | Karnofsky<br>90-100: 84<br>60-80: 76 | NR                                                                                | NR                                        | NR                                                                                                    |
| SAKK 44/00-<br>CECO/PAN.1<br>.3.001 | Gemcitabine                                | 159      | 62                      | 85   | 74     |                                      |                                                                                   |                                           |                                                                                                       |
| Herrmann et<br>al., 2007            | Capecitabine<br>plus<br>Gemcitabine        | 160      | NR                      | 86   | 74     | Karnofsky<br>90-100: 84<br>60-80: 76 | NR                                                                                | NR                                        | NR                                                                                                    |
|                                     | Gemcitabine                                | 159      |                         | 85   | 74     |                                      |                                                                                   |                                           |                                                                                                       |
| Moore et al.,<br>2007               | Erlotinib plus<br>Gemcitabine              | 285      | 63.7                    | 136  | 149    | WHO<br>0: 85<br>1: 145<br>2: 54      | NR                                                                                | NR                                        | FU or Gem given<br>concurrently as a<br>radiosensitizer<br>only: 20<br>Radiation: 22<br>Resection: 19 |



| Author<br>Year<br>Reference  | Interventions<br>[or]<br>Comparisons | # of Pts | Patient Characteristics |      |        |                                                    | Disease Characteristics          |                                              |                                                                                                       |
|------------------------------|--------------------------------------|----------|-------------------------|------|--------|----------------------------------------------------|----------------------------------|----------------------------------------------|-------------------------------------------------------------------------------------------------------|
|                              |                                      |          | Median<br>Age           | Sex  |        | Perform-<br>ance<br>Status                         | Location                         | Markers                                      | Previous<br>Treatment                                                                                 |
|                              |                                      |          |                         | Male | Female |                                                    |                                  |                                              |                                                                                                       |
|                              | Placebo plus<br>Gemcitabine          | 284      | 64.0                    | 162  | 122    | WHO<br>0: 85<br>1: 174<br>2: 52                    |                                  |                                              | FU or Gem given<br>concurrently as a<br>radiosensitizer<br>only: 25<br>Radiation: 25<br>Resection: 29 |
| Abou-Alfa et<br>al., 2006    | Exatecan plus<br>Gemcitabine         | 174      | 63.0                    | 92   | 83     | Karnofsky<br>90-100: 90<br>70-80: 81<br>60: 4      | NR                               | CA 19-9<br>Median:<br>1053 (0.8-<br>1237761) | NR                                                                                                    |
|                              | Gemcitabine                          | 174      | 62.3                    | 99   | 99     | Karnofsky<br>90-100: 90<br>70-80: 82<br>60: 2      |                                  | CA 19-9<br>Median: 597<br>(1.3-<br>304332)   |                                                                                                       |
| Stathopoulos<br>et al., 2006 | irinotecan plus<br>gemcitabine       | 60       | 64                      | 39   | 21     | WHO<br>0-1: 52<br>2: 8                             | NR                               | NR                                           | Surgery: 11<br>No Prior<br>Treatment: 49                                                              |
|                              | gemcitabine                          | 70       | 64                      | 42   | 28     | WHO<br>0-1: 8<br>2: 10                             |                                  |                                              | Surgery: 16<br>No Prior<br>Treatment: 54                                                              |
| Heinemann et<br>al., 2006    | gemcitabine plus<br>cisplatin        | 98       | 64                      | 64   | 34     | Karnofsky<br>100: 20<br>90: 24<br>80: 27<br>70: 8  | Head: 55<br>Body: 19<br>Tail: 24 | NR                                           | NR                                                                                                    |
|                              | gemcitabine                          | 97       | 66                      | 60   | 37     | Karnofsky<br>100: 19<br>90: 21<br>80: 29<br>70: 13 | Head: 55<br>Body: 24<br>Tail: 18 |                                              |                                                                                                       |
| Reni et al.,<br>2005         | PEFG                                 | 52       | 62                      | 24   | 28     | Karnofsky<br>>70: 37<br><= 70: 15                  | NR                               | NR                                           | NR                                                                                                    |

| Author<br>Year<br>Reference | Interventions<br>[or]<br>Comparisons | # of Pts | Patient Characteristics |      |        |                                                  | Disease Characteristics                         |                 |                       |  |
|-----------------------------|--------------------------------------|----------|-------------------------|------|--------|--------------------------------------------------|-------------------------------------------------|-----------------|-----------------------|--|
|                             |                                      |          | Median<br>Age           | Sex  |        | Perform-<br>ance<br>Status                       | Location                                        | Markers         | Previous<br>Treatment |  |
|                             |                                      |          |                         | Male | Female |                                                  |                                                 |                 |                       |  |
|                             | Gemcitabine                          | 47       | 59                      | 24   | 23     | Karnofsky<br>>70: 35<br></= 70: 12               |                                                 |                 |                       |  |
| Louvet et al.,<br>2005      | Gemcitabine                          | 156      | 60.1                    | 53   | 47     | WHO<br>0: 28<br>1: 54<br>2: 18                   | Head: 50<br>Body: 37<br>Tail: 13                | Median:<br>1424 | NR                    |  |
|                             | Gemcitabine<br>plus oxaliplatin      | 157      | 61.3                    | 60   | 40     | WHO<br>0: 31<br>1: 52<br>2: 17                   | Head: 54<br>Body: 27<br>Tail: 19                | Median: 965     |                       |  |
| Rocha Lima et<br>al., 2004  | Gemcitabine<br>plus Irinotecan       | 180      | 63.2                    | 103  | 73     | WHO<br>0:51<br>1:90<br>2:34<br>3:1<br>missing:4  | NR                                              | NR              | Radiation: 11         |  |
|                             | Gemcitabine                          | 180      | 60.2                    | 96   | 73     | WHO<br>0:42<br>1:91<br>2:36<br>3:0<br>missing:11 |                                                 |                 | Radiation: 14         |  |
| Berlin et al.,<br>2002      | Gemcitabine                          | 162      | 64.3                    | 87   | 75     | WHO<br>0:56<br>1:84<br>2:22                      | Head:81<br>Body: 19<br>Tail: 27<br>Unknown: 35  | NR              | NR                    |  |
|                             | E2297<br>Gemcitabine<br>plus 5-FU    | 160      | 65.8                    | 83   | 77     | WHO<br>0:36<br>1:102<br>2:22                     | Head: 87<br>Body: 36<br>Tail: 21<br>Unknown: 17 |                 |                       |  |
| Maisey et al.,<br>2002      | PVI 5-FU                             | 107      | 62                      | 68   | 39     | WHO<br>0:18<br>1:59                              | NR                                              | NR              | NR                    |  |

| Author<br>Year<br>Reference | Interventions<br>[or]<br>Comparisons | # of Pts | Patient Characteristics |      |        | Disease Characteristics            |          |         |                       |
|-----------------------------|--------------------------------------|----------|-------------------------|------|--------|------------------------------------|----------|---------|-----------------------|
|                             |                                      |          | Median<br>Age           | Sex  |        | Perform-<br>ance<br>Status         | Location | Markers | Previous<br>Treatment |
|                             |                                      |          |                         | Male | Female |                                    |          |         |                       |
|                             |                                      |          |                         |      |        | 2:28<br>3: 1                       |          |         |                       |
|                             | PVI 5-FU plus<br>mitomycin           | 102      | 61                      | 62   | 40     | WHO<br>0:20<br>1:54<br>2:24<br>3:1 |          |         |                       |

Abbreviations: CONKO, Charité Onkologie; OFF, Oxaliplatin, fluorouracil, plus folinic acid; FF, fluorouracil, plus folinic acid; NR, not reported; CA, cancer antigen; ULN, upper limit of normal; Chemo, chemotherapy; WHO, World Health Organization; FOLFIRINOX, folinic acid, fluorouracil, irinotecan, oxaliplatin; NCIC CTG, National Cancer Institute of Canada Clinical Trials Group; EGFR, Epidermal growth factor receptor; FISH, fluorescence in situ hybridization; GIP, Gruppo Italiano Pancreas; FFCD, Fédération Francophone de Cancérologie Digestive; LV5FU2-CDDP, 5-fluorouracil, folinic acid and cisplatin combination ; CEA, Carcinoembryonic antigen; SAKK, Swiss Group for Clinical Cancer Research; CECOG, Central European Cooperative Oncology Group; FU, fluorouracil; Gem, Gemcitabine; PEFG, cisplatin, epirubicin, 5-fluorouracil, gemcitabine; PVI, protracted venous infusion

**Table 2: OUTCOMES: Survival (OS), progression free survival (PFS) and disease free survival (DFS) and adverse events (AEs)**

| Study                            | Intervention                    | # of patients | Outcome                                                                                                                                                                                                                                                                                                                                                                                                                                                                                                                         |
|----------------------------------|---------------------------------|---------------|---------------------------------------------------------------------------------------------------------------------------------------------------------------------------------------------------------------------------------------------------------------------------------------------------------------------------------------------------------------------------------------------------------------------------------------------------------------------------------------------------------------------------------|
| Oettle et al., 2014<br>CONKO-003 | OFF                             | 76            | <p>The median overall survival 5.9 months; 95% CI, 4.1 to 7.4) (hazard ratio [HR], 0.66; 95% CI, 0.48 to 0.91; log-rank P .010).</p> <p>Time to progression (2.9 months; 95% CI, 2.4 to 3.2) was significantly extended also (HR, 0.68; 95% CI, 0.50 to 0.94; log-rank P _____ .019).</p> <p>Rates of adverse events were similar between treatment arms, with the exception of grades 1 to 2 neurotoxicity, which were reported in 29 patients (38.2%) in the [ (P _____ .001).</p>                                            |
|                                  | FF                              | 84            | <p>The median overall survival (3.3 months; 95% CI, 2.7 to 4.0) was significantly improved (hazard ratio [HR], 0.66; 95% CI, 0.48 to 0.91; log-rank P .010).</p> <p>Time to progression (2.0 months; 95% CI, 1.6 to 2.3) was significantly extended also (HR, 0.68; 95% CI, 0.50 to 0.94; log-rank P .019).</p> <p>Rates of adverse events were similar between treatment arms, with the exception of grades 1 to 2 neurotoxicity, which were reported in and six patients (7.1%) in the OFF and FF groups, (P _____ .001).</p> |
| Von Hoff et al., 2013            | nab-Paclitaxel plus Gemcitabine | 431           | <p>The median overall survival was 8.5 months (hazard ratio for death, 0.72; 95% confidence interval [CI], 0.62 to 0.83; P&lt;0.001).</p> <p>The survival rate was 35% at 1 year, and 9% at 2 years.</p> <p>The median progression-free survival was 5.5 months. (hazard ratio, 0.69; 95%</p>                                                                                                                                                                                                                                   |

| Study                | Intervention             | # of patients | Outcome                                                                                                                                                                                                                                                                                                                                                                                                                                                                                                                                                                                                                                                                                                                                      |
|----------------------|--------------------------|---------------|----------------------------------------------------------------------------------------------------------------------------------------------------------------------------------------------------------------------------------------------------------------------------------------------------------------------------------------------------------------------------------------------------------------------------------------------------------------------------------------------------------------------------------------------------------------------------------------------------------------------------------------------------------------------------------------------------------------------------------------------|
|                      |                          |               | <p>CI, 0.58 to 0.82; P&lt;0.001); the response rate according to independent review was 23% versus 7% in the two groups (P&lt;0.001).</p> <p>The most common adverse events of grade 3 or higher were neutropenia (38%), fatigue (17%); and neuropathy (17% Febrile neutropenia occurred in 3% neuropathy of grade 3 or &gt;r higher improved to grade 1 or lower in a median of 29 days</p>                                                                                                                                                                                                                                                                                                                                                 |
|                      | Gemcitabine alone        | 430           | <p>The median overall survival was 6.7 months (hazard ratio for death, 0.72; 95% confidence interval [CI], 0.62 to 0.83; P&lt;0.001).</p> <p>The survival rate was 22% at 1 year and 4% at 2 years.</p> <p>The median progression-free survival was 3.7 months in the gemcitabine group (hazard ratio for disease progression or death, 0.69; 95% CI, 0.58 to 0.82; P&lt;0.001);</p> <p>The response rate according to independent review was 23% versus 7% in the two groups (P&lt;0.001).</p> <p>The most common adverse events of grade 3 or higher were 27%; fatigue .7%, and neuropathy 1%). Febrile neutropenia occurred in 1% of the patients; neuropathy of grade 3 or higher improved to grade 1 or lower in a median of 29 day</p> |
| Rougier et al., 2013 | Gemcitabine plus placebo | 275           | <p>The study was stopped for futility following a planned interim analysis of OS in 427 randomized patients. With a median follow-up of 7.9 months, based on the 546 patients at study termination.</p>                                                                                                                                                                                                                                                                                                                                                                                                                                                                                                                                      |

| Study                            | Intervention                 | # of patients | Outcome                                                                                                                                                                                                                                                                                                                                                                                                                                                             |
|----------------------------------|------------------------------|---------------|---------------------------------------------------------------------------------------------------------------------------------------------------------------------------------------------------------------------------------------------------------------------------------------------------------------------------------------------------------------------------------------------------------------------------------------------------------------------|
|                                  | Gemcitabine plus aflibercept | 271           | <p>Median OS was 7.8 months in the gemcitabine plus placebo arm (n=275) versus 6.5 months in the gemcitabine plus aflibercept arm (n=271), which was not significant (hazard ratio 1.165, 95% confidence interval (CI) 0.921-1.473, p=0.2034).</p> <p>Median progression-free survival was 3.7 months in both arms. Treatment discontinuations due to adverse events were more frequent in the aflibercept than in the placebo-containing arm (23% versus 12%).</p> |
| Goncalves et al., 2012<br>BAYPAN | Gemcitabine plus placebo     | 52            | <p>Median and the 6-month PFS were 5.7 months and 48%. (P = 0.902, stratified log-rank test)</p> <p>Median overall survivals was 9.2 (P = 0.231, log-rank test).</p> <p>Overall response rates were similar (19%).</p>                                                                                                                                                                                                                                              |
|                                  | Gemcitabine plus sorafenib   | 52            | <p>The median and the 6 month PFS were 3.8 months and 33% (P = 0.902, stratified log-rank test), respectively</p> <p>The median overall survivals was 8 months (P = 0.231, log-rank test).</p> <p>The overall response rates were similar 23%.</p>                                                                                                                                                                                                                  |
| Conroy et al., 2011              | FOLFIRINOX                   | 171           | <p>The median overall survival was 11.1 months, (hazard ratio for death, 0.57; 95% confidence interval [CI], 0.45 to 0.73; P&lt;0.001).</p> <p>Median progression-free survival was 6.4 months , (hazard ratio for disease progression, 0.47; 95% CI, 0.37 to 0.59; P&lt;0.001)</p> <p>The objective response rate was 31.6%, (P&lt;0.001).</p>                                                                                                                     |

| Study                | Intervention              | # of patients | Outcome                                                                                                                                                                                                                                                                                                                                                                                                                                                                                  |
|----------------------|---------------------------|---------------|------------------------------------------------------------------------------------------------------------------------------------------------------------------------------------------------------------------------------------------------------------------------------------------------------------------------------------------------------------------------------------------------------------------------------------------------------------------------------------------|
|                      |                           |               | <p>More adverse events were noted in the FOLFIRINOX group; 5.4% of patients in this group had febrile neutropenia. At 6 months, 31% of the patients in the FOLFIRINOX group had a definitive degradation of the quality of life versus 66% in the gemcitabine group (hazard ratio, 0.47; 95% CI, 0.30 to 0.70; P&lt;0.001)</p>                                                                                                                                                           |
|                      | Gemcitabine               | 171           | <p>The median overall survival was 6.8 months, (hazard ratio for death, 0.57; 95% confidence interval [CI], 0.45 to 0.73; P&lt;0.001).</p> <p>Median progression-free survival was 3.3 months , (hazard ratio for disease progression, 0.47; 95% CI, 0.37 to 0.59; P&lt;0.001).</p> <p>The objective response rate was 9.4, (P&lt;0.001)</p>                                                                                                                                             |
| Kindler et al., 2011 | Axitinib plus gemcitabine | 314           | <p>At an interim analysis in January, 2009, the independent data monitoring committee concluded that the futility boundary had been crossed.</p> <p>Median overall survival was 8.5 months (95% CI 6.9-9.5) for gemcitabine plus axitinib (n=314, data missing for two patients; hazard ratio 1.014, 95% CI 0.786-1.309; one-sided p=0.5436).</p>                                                                                                                                        |
|                      | Placebo plus Gemcitabine  | 316           | <p>The most common grade 3 or higher adverse events for gemcitabine plus axitinib were hypertension (20 [7%] events, abdominal pain (20 [7%] ,fatigue (27 [9%] , and anorexia (19 [6%]/</p> <p>Median overall survival was 8.3 months (6.9-10.3) (n=316; hazard ratio 1.014, 95% CI 0.786-1.309; one-sided p=0.5436).</p> <p>The most common grade 3 or higher adverse events for gemcitabine plus placebo were hypertension 5 [2%] events, abdominal pain (17 [6%]), fatigue and 21</p> |

| Study                                             | Intervention                                                         | # of patients | Outcome                                                                                                                                                                                                                                                                                                                                                                                                                                                                                                                                                                                                                                                                                                   |
|---------------------------------------------------|----------------------------------------------------------------------|---------------|-----------------------------------------------------------------------------------------------------------------------------------------------------------------------------------------------------------------------------------------------------------------------------------------------------------------------------------------------------------------------------------------------------------------------------------------------------------------------------------------------------------------------------------------------------------------------------------------------------------------------------------------------------------------------------------------------------------|
|                                                   |                                                                      |               | [7%]), and anorexia and 11 [4%]).                                                                                                                                                                                                                                                                                                                                                                                                                                                                                                                                                                                                                                                                         |
| da Cunha Santos et al., 2010<br><br>NCIC CTG PA.3 | Gemcitabine vs gemcitabine plus erlotinib in KRAS mutant patients    | 92            | KRAS analysis was successful in 117 patients, and EGFR FISH analysis was successful in 107 patients. KRAS mutations were identified in 92 patients (78.6%), and EGFR amplification or high polysomy (FISH-positive results) was identified in 50 patients (46.7%). The hazard ratio of death between gemcitabine /erlotinib and gemcitabine /placebo was 0.66 (95% confidence interval [CI], 0.28-1.57) for patients with wild-type KRAS and 1.07 (95% CI, 0.68-1.66) for patients with mutant KRAS (P value for interaction = .38), and the hazard ratio was 0.6 (95% CI, 0.34-1.07) for FISH-negative patients and 0.90 (95% CI, 0.49-1.65) for FISH-positive patients (P value for interaction = .32). |
|                                                   | Gemcitabine vs gemcitabine plus erlotinib in KRAS wild type patients | 25            |                                                                                                                                                                                                                                                                                                                                                                                                                                                                                                                                                                                                                                                                                                           |
|                                                   | Gemcitabine vs gemcitabine plus erlotinib in EGFR FISH+ patients     | 50            |                                                                                                                                                                                                                                                                                                                                                                                                                                                                                                                                                                                                                                                                                                           |
|                                                   | Gemcitabine vs gemcitabine plus erlotinib in EGFR FISH- patients     | 57            |                                                                                                                                                                                                                                                                                                                                                                                                                                                                                                                                                                                                                                                                                                           |



| Study                         | Intervention               | # of patients | Outcome                                                                                                                                                                                                                                                                                                                                                                                                                                                                                                                                                           |
|-------------------------------|----------------------------|---------------|-------------------------------------------------------------------------------------------------------------------------------------------------------------------------------------------------------------------------------------------------------------------------------------------------------------------------------------------------------------------------------------------------------------------------------------------------------------------------------------------------------------------------------------------------------------------|
| Moinpour et al., 2010         | Gemcitabine                | 359           | The two treatment arms did not differ statistically in the percentage of patients with successful worst pain palliation. Longitudinal analyses showed significantly improved emotional well-being for patients on both arms by weeks 13 and 17 ( $P < .01$ and $P < .001$ ). An exploratory longitudinal analysis of worst pain showed significant decreases at all time points for both arms ( $P < .01$ and $P < .001$ ). Significant treatment arm differences for either worst pain or emotional well-being were not observed at any of the assessment times. |
|                               | Gemcitabine plus cetuximab | 361           |                                                                                                                                                                                                                                                                                                                                                                                                                                                                                                                                                                   |
| Colucci et al., 2010<br>GIP-1 | Gemcitabine                | 199           | <p>Median overall survival was 8.3 months (HR, 1.10; 95% CI, 0.89 to 1.35; <math>P = .38</math>).</p> <p>Median progression-free survival was 3.9 months (HR, 0.97; 95% CI, 0.80 to 1.19; <math>P = .80</math>).</p> <p>The objective response rate was 10.1% in A (<math>P = .37</math>).</p> <p>Clinical benefit was experienced by 23.0% in (<math>P = .057</math>).</p>                                                                                                                                                                                       |
|                               | Gemcitabine plus Cisplatin | 201           | <p>Median overall survival was 7.2 months (HR, 1.10; 95% CI, 0.89 to 1.35; <math>P = .38</math>).</p> <p>Median progression-free survival was 3.8 months, (HR, 0.97; 95% CI, 0.80 to 1.19; <math>P = .80</math>).</p> <p>Clinical benefit was experienced by 15.1% in B (<math>P = .057</math>).</p> <p>The objective response rate was 12.9% (<math>P = .37</math>).</p> <p>Combination therapy produced more hematologic toxicity, without relevant differences in non-hematologic toxicity.</p>                                                                |

| Study                               | Intervention                  | # of patients | Outcome                                                                                                                                                                                                                                                                                                                                                                                                                                                                                                                                                                                                |
|-------------------------------------|-------------------------------|---------------|--------------------------------------------------------------------------------------------------------------------------------------------------------------------------------------------------------------------------------------------------------------------------------------------------------------------------------------------------------------------------------------------------------------------------------------------------------------------------------------------------------------------------------------------------------------------------------------------------------|
| Dahan et al., 2010<br><br>FFCD 0301 | LV5FU2-CDDP                   | 102           | <p>Median OS in Arm A was 6.6 months. (p = 0.85).</p> <p>Median progression-free survival was similar between Arms A and B.</p> <p>More grade 3/4 toxicities were observed when LV5FU2-CDDP was administered as a first-line treatment at 79% (p = 0.018)</p> <p>Median OS in 8.0 months (p = 0.85).</p>                                                                                                                                                                                                                                                                                               |
|                                     | Gemcitabine                   | 100           | <p>Median progression-free survival was similar between Arms A and B.</p> <p>More grade 3/4 toxicities were observed when gemcitabine was administered as a first-line treatment 64% (p = 0.018).</p>                                                                                                                                                                                                                                                                                                                                                                                                  |
| Cunningham et al., 2009             | Gemcitabine                   | 266           | <p>Objective response rate with GEM was 12.4%; P = .034)</p> <p>Objective response rate with GEM-CAP was 19.1%; P = .034)</p> <p>Progression-free survival (hazard ratio [HR], 0.78; 95% CI, 0.66 to 0.93; P = .004) and was associated with a trend toward improved OS (HR, 0.86; 95% CI, 0.72 to 1.02; P = .08) compared with GEM alone.</p> <p>This trend for OS benefit for GEM-CAP was consistent across different prognostic subgroups according to baseline stratification factors (stage and performance status) and remained after adjusting for these stratification factors (P = .077).</p> |
|                                     | Gemcitabine plus Capecitabine | 267           |                                                                                                                                                                                                                                                                                                                                                                                                                                                                                                                                                                                                        |

| Study                        | Intervention                           | # of patients | Outcome                                                                                                                                                                                                                                                                                                                                                                                                                                |
|------------------------------|----------------------------------------|---------------|----------------------------------------------------------------------------------------------------------------------------------------------------------------------------------------------------------------------------------------------------------------------------------------------------------------------------------------------------------------------------------------------------------------------------------------|
| Van Cutsem et al., 2009      | Gemcitabine-erlotinib plus placebo     | 301           | Median OS was 7.1 (hazard ratio [HR], 0.89; 95% CI, 0.74 to 1.07; P = .2087); this difference was not statistically significant.                                                                                                                                                                                                                                                                                                       |
|                              | Gemcitabine-erlotinib plus Bevacizumab | 306           | Median OS was 6.0 months (hazard ratio [HR], 0.89; 95% CI, 0.74 to 1.07; P = .2087); this difference was not statistically significant.<br><br>Adding bevacizumab to gemcitabine-erlotinib significantly improved PFS (HR, 0.73; 95% CI, 0.61 to 0.86; P = .0002). Treatment with bevacizumab plus gemcitabine-erlotinib was well tolerated: safety data did not differ from previously described safety profiles for individual drugs |
| Poplin et al., 2009<br>E6201 | Gemcitabine                            | 275           | Median survival and 1-year survival were 4.9 months (95% CI, 4.5 to 5.6) and 16%, (95% CI, 5.4 to 6.9), (HR, 0.83; stratified log-rank P = .04.                                                                                                                                                                                                                                                                                        |
|                              | Gemcitabine fixed-dose rate infusion   | 277           | The median survival and 1-year survival were 6.2 months (HR, 0.83; stratified log-rank P = .04), 21% and (95% CI, 4.9 to 6.5). Grade 3/4 neutropenia and thrombocytopenia were greatest with GEM FDR.                                                                                                                                                                                                                                  |
|                              | Gemcitabine plus oxaliplatin           | 272           | The median survival and 1-year survival were 5.7 months (95% CI, 4.9 to 6.5) and 21% (HR, 0.88; stratified log-rank P = .22).<br><br>*None of these differences met the prespecified criteria for significance. Survival was 4 months for those with metastatic disease.                                                                                                                                                               |

| Study                                                           | Intervention                  | # of patients | Outcome                                                                                                                                                                                                                                                                                                                                                                                                                                                              |
|-----------------------------------------------------------------|-------------------------------|---------------|----------------------------------------------------------------------------------------------------------------------------------------------------------------------------------------------------------------------------------------------------------------------------------------------------------------------------------------------------------------------------------------------------------------------------------------------------------------------|
| Bernhard et al., 2008<br>SAKK<br>44/00-<br>CECO/PAN.<br>1.3.001 | Capecitabine plus Gemcitabine | 160           | Clinical benefit response of 19% treated with GemCap with a median duration of 9.5 weeks, respectively (P < .02). 54% of patients treated with GemCap had no Clinical benefit response.                                                                                                                                                                                                                                                                              |
|                                                                 | Gemcitabine                   | 159           | <p>Clinical benefit response of 19% treated with Gem with a median duration of 9.5 weeks, (P &lt; .02)</p> <p>60% treated with Gem had no clinical benefit response (remaining patients were not assessable).</p> <p>There was no treatment difference in QOL (n = 311). QOL indicators were improving under chemotherapy (P &lt; .05). These changes differed by the time to failure, with a worsening 1 to 2 months before treatment failure (all P &lt; .05).</p> |
| Herrmann et al., 2007                                           | Capecitabine plus Gemcitabine | 160           | <p>Median OS was 8.4 months, (P = .234).</p> <p>Post hoc analysis in patients with good KPS (score of 90 to 100) showed a significant prolongation of median OS of 10.1, P = .014).</p>                                                                                                                                                                                                                                                                              |
|                                                                 | Gemcitabine                   | 159           | <p>Median OS time was 7.2 months (P = .234).</p> <p>Post hoc analysis in patients with good KPS (score of 90 to 100) showed a significant reduction of median OS time of 7.4 months, P = .014).</p> <p>The overall frequency of grade 3 or 4 adverse events was similar in each arm. Neutropenia was the most frequent grade 3 or 4 adverse event in both arms</p>                                                                                                   |

| Study                  | Intervention               | # of patients | Outcome                                                                                                                                                                                                                                                                                                                                                                                                                                                                                                                             |
|------------------------|----------------------------|---------------|-------------------------------------------------------------------------------------------------------------------------------------------------------------------------------------------------------------------------------------------------------------------------------------------------------------------------------------------------------------------------------------------------------------------------------------------------------------------------------------------------------------------------------------|
| Moore et al., 2007     | Erlotinib plus Gemcitabine | 285           | <p>Overall survival based on an intent-to-treat analysis was significantly prolonged on the erlotinib/ gemcitabine arm with a hazard ratio (HR) of 0.82 (95% CI, 0.69 to 0.99; P = .038, adjusted for stratification factors; median 6.24 months).</p> <p>One-year survival was 23% P = .023).</p> <p>Progression-free survival was significantly longer with erlotinib plus gemcitabine with an estimated HR of 0.77 (95% CI, 0.64 to 0.92; P = .004).</p>                                                                         |
|                        | Placebo plus Gemcitabine   | 284           | <p>Overall survival based on an intent-to-treat analysis was significantly prolonged on the erlotinib/ gemcitabine arm with a hazard ratio (HR) of 0.82 (95% CI, 0.69 to 0.99; P = .038, adjusted for stratification factors; 5.91 months).</p> <p>One-year survival was 17%; P = .023).</p> <p>Objective response rates were not significantly different between the arms, although more patients on erlotinib had disease stabilization. There was a higher incidence of some adverse events with erlotinib plus gemcitabine.</p> |
| Abou-Alfa et al., 2006 | Exatecan plus Gemcitabine  | 174           | <p>Median survival time was 6.7 months.and 6.2 months for gemcitabine alone (P = .52).</p> <p>One complete response (CR; &lt; 1%) and 11 partial responses (PRs; 6.3%) were observed. Grade 3 and 4 toxicities neutropenia (30%); thrombocytopenia (15%).</p>                                                                                                                                                                                                                                                                       |

| Study                     | Intervention                | # of patients | Outcome                                                                                                                                                                                                                                                                                                                                                                    |
|---------------------------|-----------------------------|---------------|----------------------------------------------------------------------------------------------------------------------------------------------------------------------------------------------------------------------------------------------------------------------------------------------------------------------------------------------------------------------------|
|                           | Gemcitabine                 | 174           | <p>Median survival time was 6.2 months (P = .52).</p> <p>One CR (&lt; 1%) and eight PRs (4.6%) were observed.</p> <p>Grade 3 and 4 toxicities neutropenia (15%); thrombocytopenia (4%).</p>                                                                                                                                                                                |
| Stathopoulos et al., 2006 | Irinotecan plus Gemcitabine | 60            | <p>The overall response rate was 15% (95% CI 5.96-24.04 and 95% CI 2.97-17.03, respectively; P=0.387).</p> <p>The median time to tumor progression was 2.8 months and median survival time was 6.</p> <p>One-year survival was 24.3%.</p>                                                                                                                                  |
|                           | Gemcitabine                 | 70            | <p>The overall response rate was 10% (95% CI 5.96-24.04 and 95% CI 2.97-17.03, respectively; P=0.387).</p> <p>The median time to tumor progression was 2.9 months and median survival time was 6.5 months.</p> <p>One-year survival was 21.8%.</p>                                                                                                                         |
| Heinemann et al., 2006    | Gemcitabine plus Cisplatin  | 98            | <p>Median progression-free survival of 5.3 months; hazard ratio [HR] = 0.75; P = .053).</p> <p>Median overall survival was superior at 7.5 months), an advantage which did not, however, reach statistical significance (HR = 0.80; P = .15).</p> <p>Tumor response rate was 10.2%.</p> <p>Tumor response rates were comparable between treatment arms (10.2% v 8.2%).</p> |

| Study               | Intervention                 | # of patients | Outcome                                                                                                                                                                                                                                                                                                                                                                                                                                                                                                                                                                                                                                            |
|---------------------|------------------------------|---------------|----------------------------------------------------------------------------------------------------------------------------------------------------------------------------------------------------------------------------------------------------------------------------------------------------------------------------------------------------------------------------------------------------------------------------------------------------------------------------------------------------------------------------------------------------------------------------------------------------------------------------------------------------|
|                     |                              |               | <p>The rate of stable disease was, however, greater in the combination arm at 60.2% (P &lt; .001). Grade 3 to 4 hematologic toxicity did not exceed 15% in both treatment arms.</p> <p>Median progression-free survival of 3.1 months; hazard ratio [HR] = 0.75; P = .053).</p> <p>Median overall survival was 6.0 months, an advantage which did not, however, reach statistical significance (HR = 0.80; P = .15).</p> <p>Tumor response rate was 8.2%.</p> <p>The rate of stable disease was, however, greater in the combination arm was 40.2%; P &lt; .001). Grade 3 to 4 hematologic toxicity did not exceed 15% in both treatment arms.</p> |
|                     | Gemcitabine                  | 97            |                                                                                                                                                                                                                                                                                                                                                                                                                                                                                                                                                                                                                                                    |
| Reni et al., 2005   | PEFG                         | 52            | <p>The largest differences between arms favored PEFG. Expressed as improvement greater than or equal to 10 points from baseline (PEFG/gemcitabine), these were: emotional function (43/18%), fatigue (41/17%), QOL (55/29%), pain (64/41%), and flatulence (50/26%). Only change in sexual function favored gemcitabine (19/42%). Physical function, fatigue, appetite, and satisfaction with healthcare improved in 40-46% of partial responders compared with 0-12% of patients with stable disease.</p>                                                                                                                                         |
|                     | Gemcitabine                  | 47            |                                                                                                                                                                                                                                                                                                                                                                                                                                                                                                                                                                                                                                                    |
| Louvet et al., 2005 | Gemcitabine plus oxaliplatin | 157           | <p>Response rate (26.8%; P = .04)</p> <p>Progression-free survival (5.8; P = .04), ]</p> <p>Clinical benefit (38.2%; P = .03).</p>                                                                                                                                                                                                                                                                                                                                                                                                                                                                                                                 |

| Study                   | Intervention                | # of patients | Outcome                                                                                                                                                                                                                                                                                                                                                                                                                                                                                |
|-------------------------|-----------------------------|---------------|----------------------------------------------------------------------------------------------------------------------------------------------------------------------------------------------------------------------------------------------------------------------------------------------------------------------------------------------------------------------------------------------------------------------------------------------------------------------------------------|
|                         |                             |               | <p>Median overall survival (OS) was 9.0 (P = .13).</p> <p>Higher incidence of National Cancer Institute Common Toxicity Criteria grade 3 and 4 toxicity per patient was observed for platelets (14.0%), vomiting (8.9%), and neurosensory symptoms (19.1%).</p>                                                                                                                                                                                                                        |
|                         | Gemcitabine                 | 157           | <p>Response rate (17.3%, P = .04)</p> <p>Progression-free survival (3.7 months; P = .04).</p> <p>Clinical benefit ( 26.9%, P = .03).</p> <p>Median overall survival (OS) for 7.1 months, respectively (P = .13).</p> <p>Grade 3 and 4 toxicity per patient was observed for platelets 3.2%, vomiting (3.2%), and neurosensory symptoms (0%).</p>                                                                                                                                       |
| Rocha Lima et al., 2004 | Gemcitabine plus Irinotecan | 180           | <p>Median survival times were 6.3 months for IRINOGEN (95% CI, 4.7 to 7.5 months) and 6.6 months for GEM (95% CI, 5.2 to 7.8 months; log-rank P =.789).</p> <p>Tumor response rates were 16.1% (95% CI, 11.1% to 22.3%) for IRINOGEN (chi2 P &lt;.001).</p> <p>Median TTP was 3.5 months for IRINOGEN (log-rank P =.352).</p> <p>However, subset analyses in patients with locally advanced disease suggested a TTP disadvantage with IRINOGEN (median, 7.7 v 3.9 months). CA 19-9</p> |



| Study                        | Intervention | # of patients | Outcome                                                                                                                                                                                                                                                                                                                                                                                                                                                                                                                                                                                                                                                                                                                                                                                                            |
|------------------------------|--------------|---------------|--------------------------------------------------------------------------------------------------------------------------------------------------------------------------------------------------------------------------------------------------------------------------------------------------------------------------------------------------------------------------------------------------------------------------------------------------------------------------------------------------------------------------------------------------------------------------------------------------------------------------------------------------------------------------------------------------------------------------------------------------------------------------------------------------------------------|
|                              | Gemcitabine  | 180           | <p>progression was positively correlated with tumor progression.</p> <p>The incidence of grade 3 diarrhea was higher in the IRINOGEN group but grade 3 to 4 hematologic toxicities and quality-of-life outcomes were similar.</p> <p>Median survival times were 6.6 months (95% CI, 5.2 to 7.8 months; log-rank P =.789).</p> <p>Tumor response rates were and 4.4% (95% CI, 1.9% to 8.6%) (chi2 P &lt;.001).</p> <p>Median TTP was 3.0 months (log-rank P =.352).</p> <p>Subset analyses in patients with locally advanced disease suggested a TTP disadvantage with GEM (median, 3.9 months). CA 19-9 progression was positively correlated with tumor progression.</p> <p>The incidence of grade 3 diarrheas was lower but grade 3 to 4 hematologic toxicities and quality-of-life outcomes were similar. .</p> |
| Berlin et al., 2002<br>E2297 | Gemcitabine  | 162           | <p>Median survival was 5.4 months (P =.09).</p> <p>Progression-free survival was 2.2 months, (P =.022).</p> <p>Objective responses were uncommon and were observed in only 5.6% of patients treated with gemcitabine.</p> <p>Most toxicities were hematologic or gastrointestinal; no significant differences were noted between the two treatment arms.</p>                                                                                                                                                                                                                                                                                                                                                                                                                                                       |

| Study               | Intervention            | # of patients | Outcome                                                                                                                                                                                                                                                                                                                                                                                                                                                                                                                                       |
|---------------------|-------------------------|---------------|-----------------------------------------------------------------------------------------------------------------------------------------------------------------------------------------------------------------------------------------------------------------------------------------------------------------------------------------------------------------------------------------------------------------------------------------------------------------------------------------------------------------------------------------------|
|                     | Gemcitabine plus 5-FU   | 160           | <p>Median survival was 6.7 months (P =.09).</p> <p>Progression-free survival was 3.4 months (P =.022).</p> <p>Objective responses were uncommon and were observed in only 6.9%..</p> <p>Most toxicities were hematologic or gastrointestinal; no significant differences were noted between the two treatment arms.</p>                                                                                                                                                                                                                       |
| Maisey et al., 2002 | PVI 5-FU                | 107           | <p>The overall response rate was 8.4% (95% confidence interval [CI] 3.2% to 13.7% 95% (P =.04).</p> <p>Median failure-free survival was 2.8 months (P =.14).</p> <p>Median survival was 5.1 months (P =.34).</p> <p>Toxicities were mild. No differences in infection were seen. No patients developed hemolytic uremic syndrome.</p>                                                                                                                                                                                                         |
|                     | PVI 5-FU plus mitomycin | 102           | <p>The overall response rate was 17.6%; (95% confidence interval [CI] 10.3% to 25.1%, (P =.04).</p> <p>Median failure-free survival was 2 3.8 months (P =.14).</p> <p>Median survival was 6.5 months (P =.34).</p> <p>Toxicities in both arms were mild. There was an increased incidence of neutropenia in the 5-FU plus MMC arm (P &lt;.01), although no differences in infection were seen.</p> <p>No patients developed hemolytic uremic syndrome.</p> <p>Global QOL improved significantly after 24 weeks of treatment compared with</p> |

| Study | Intervention | # of patients | Outcome                                                                                                                        |
|-------|--------------|---------------|--------------------------------------------------------------------------------------------------------------------------------|
|       |              |               | baseline for patients receiving 5-FU plus MMC, although there was no statistically significant difference in QOL between arms. |

Abbreviations: CONKO, Charité Onkologie; OFF, Oxaliplatin, fluorouracil, plus folinic acid; FF, fluorouracil, plus folinic acid; OS, overall survival; PFS, progression free survival; APC, advanced pancreatic cancer; FOLFIRINOX, folinic acid, fluorouracil, irinotecan, oxaliplatin; NCIC CTG, National Cancer Institute of Canada Clinical Trials Group; EGFR, Epidermal growth factor receptor; FISH, fluorescence in situ hybridization; HRQL, health-related quality of life; GIP, Gruppo Italiano Pancreas; FFC, Fédération Francophone de Cancérologie Digestive; LV5FU2-CDDP, 5-fluorouracil, folinic acid and cisplatin combination; GEM, Gemcitabine; CAP, Capecitabine; FDR, fixed dose rate; GEMOX, gemcitabine and oxaliplatin; SAKK, Swiss Group for Clinical Cancer Research; CECOG, Central European Cooperative Oncology Group; CBR, clinical benefit response; QOL, quality of life; PEF, cisplatin, epirubicin, 5-fluorouracil, gemcitabine; IRINOX, irinotecan plus gemcitabine; FU, fluorouracil; PVI, protracted venous infusion; MMC, mitomycin

**Table 3: Systematic Reviews and Meta-analyses (Metastatic)**

| Author/Title                                                                                                                                                                                                                                                                     | Journal                                 | Patient and Study Characteristics                                                                                                                                                                                                                                                                                                             | Results                                                                                                                                                                                                                                                                                                                                                                                                                                                                                                                                                                                                                                              | Conclusion                                                                                                                                                                                                                                                                                                                                                                                                                                                                                                                                                                                                                                                                                                         |
|----------------------------------------------------------------------------------------------------------------------------------------------------------------------------------------------------------------------------------------------------------------------------------|-----------------------------------------|-----------------------------------------------------------------------------------------------------------------------------------------------------------------------------------------------------------------------------------------------------------------------------------------------------------------------------------------------|------------------------------------------------------------------------------------------------------------------------------------------------------------------------------------------------------------------------------------------------------------------------------------------------------------------------------------------------------------------------------------------------------------------------------------------------------------------------------------------------------------------------------------------------------------------------------------------------------------------------------------------------------|--------------------------------------------------------------------------------------------------------------------------------------------------------------------------------------------------------------------------------------------------------------------------------------------------------------------------------------------------------------------------------------------------------------------------------------------------------------------------------------------------------------------------------------------------------------------------------------------------------------------------------------------------------------------------------------------------------------------|
| <p>Sgouros J (1), Maraveyas A</p> <p>Excess premature (3-month) mortality in advanced pancreatic cancer could be related to fatal vascular thromboembolic events. A hypothesis based on a systematic review of phase III chemotherapy studies in advanced pancreatic cancer.</p> | <p>Acta Oncol. 2008;47(3):337-46.</p>   | <p>A Medline and EMBASE search was done for chemotherapy or chemotherapy based phase III studies in advanced pancreatic cancer published since 1997. Similar search was done at the American Society of Clinical Oncology web site for abstracts presented since 2000. Three months mortality was based on the survival curves presented.</p> | <p>Fourteen papers and five abstracts met our criteria and are included in our review. Six thousand two hundred and twelve patients participated in these trials and 1,447 (23.3%) died in the first 3-month period. Figures were worse in patients with metastases and poorer performance status. Assuming that most deaths during treatment happened during the first 3-months, cause of death was reported in only 40 cases (2.8%). Progressive cancer was reported as cause of death in 21 of these cases. Less frequent causes of death were reported to be infections, 'complications of cancer', thromboembolic events and renal failure.</p> | <p>Overall treatment-related deaths represent a very small percentage of the deaths happening during the 3-month period, and are unlikely to be under-reported given the Good Clinical Practice oversight of these trials. Progressive cancer is likely to be an important cause of early mortality but given the very select nature of the trial-related population this cannot explain the phenomenon of 3-month early death burden of 23.3%. Our hypothesis, supported by multiple autopsy series, is that early death burden in advanced pancreatic cancer trial patients is likely to be due to under-reported vascular thromboembolic events. Thromboprophylaxis needs to be addressed in future trials.</p> |
| <p>Yang ZY (1), Yuan JQ, Di MY, Zheng DY, Chen JZ, Ding H, Wu</p>                                                                                                                                                                                                                | <p>PLoS One. 2013;8(3):e57528. doi:</p> | <p>PubMed, EMBASE, The Cochrane Library and abstracts of recent major conferences were systematically searched</p>                                                                                                                                                                                                                            | <p>Sixteen studies containing 1,308 advanced pancreatic cancer patients treated with gemcitabine plus erlotinib were included. The reported</p>                                                                                                                                                                                                                                                                                                                                                                                                                                                                                                      | <p>Gemcitabine plus erlotinib represent a new option for the treatment of advanced pancreatic cancer, with mild but clinically meaningful additive efficacy compared with gemcitabine alone. Its safety profile</p>                                                                                                                                                                                                                                                                                                                                                                                                                                                                                                |

| Author/Title                                                                                                                                   | Journal                                               | Patient and Study Characteristics                                                                                                                                                                                                                                                                                                                                                                                                                                                                                                                                                                                                                                        | Results                                                                                                                                                                                                                                                                                                                                                                                                                                                                                                                                                                                                                                                                                                                                                                                                                                                               | Conclusion                                                                                              |
|------------------------------------------------------------------------------------------------------------------------------------------------|-------------------------------------------------------|--------------------------------------------------------------------------------------------------------------------------------------------------------------------------------------------------------------------------------------------------------------------------------------------------------------------------------------------------------------------------------------------------------------------------------------------------------------------------------------------------------------------------------------------------------------------------------------------------------------------------------------------------------------------------|-----------------------------------------------------------------------------------------------------------------------------------------------------------------------------------------------------------------------------------------------------------------------------------------------------------------------------------------------------------------------------------------------------------------------------------------------------------------------------------------------------------------------------------------------------------------------------------------------------------------------------------------------------------------------------------------------------------------------------------------------------------------------------------------------------------------------------------------------------------------------|---------------------------------------------------------------------------------------------------------|
| <p>XY, Huang YF, Mao C, Tang JL.</p> <p>Gemcitabine plus erlotinib for advanced pancreatic cancer: a systematic review with meta-analysis.</p> | <p>10.1371/journal.pone.0057528. Epub 2013 Mar 5.</p> | <p>to identify relevant publications. Studies that were conducted in advanced pancreatic cancer patients treated with gemcitabine plus erlotinib (with or without comparison with gemcitabine alone) and reporting objective response rate, disease control rate, progression-free survival, time-to-progression, overall survival, 1-year survival rate and/or adverse events were included. Data on objective response rate, disease control rate, 1-year survival rate and adverse events rate, respectively, were combined mainly by using Meta-Analyst software with a random-effects model. Data on progression-free survival, time-to-progression and overall</p> | <p>median progression-free survival (or time-to-progression), median overall survival, 1-year survival rates, objective response rates and disease control rates were 2-9.6 months, 5-12.5 months, 20%-51%, 0%-28.6% and 25.0%-83.3%, respectively. The weighted 1-year survival rate, objective response rate and disease control rate based on studies reporting robust results were 27.9%, 9.1% and 57.0%, respectively. According to the studies with relevant data, the incidences of total and severe adverse events were 96.3% and 62.9%, respectively. The most frequently reported adverse events were leucopenia, rash, diarrhea, vomiting, neutropenia, thrombocytopenia, anaemia, stomatitis, drug-induced liver injury, fatigue and fever. Compared with gemcitabine alone, the progression-free survival and overall survival with gemcitabine plus</p> | <p>is generally acceptable, although careful management is needed for some specific adverse events.</p> |

| Author/Title                                                                                                                                                                                                                                             | Journal                                    | Patient and Study Characteristics                                                                                                                                                                                                      | Results                                                                                                                                                                                                                                                                                                                                                                                                                                                                                                                                                                                                                                                                                                             | Conclusion                                                                                                                                                                                                                                                                                                                                                                                                                                                                                                                                                                                                                                                                                                                                                                                                                 |
|----------------------------------------------------------------------------------------------------------------------------------------------------------------------------------------------------------------------------------------------------------|--------------------------------------------|----------------------------------------------------------------------------------------------------------------------------------------------------------------------------------------------------------------------------------------|---------------------------------------------------------------------------------------------------------------------------------------------------------------------------------------------------------------------------------------------------------------------------------------------------------------------------------------------------------------------------------------------------------------------------------------------------------------------------------------------------------------------------------------------------------------------------------------------------------------------------------------------------------------------------------------------------------------------|----------------------------------------------------------------------------------------------------------------------------------------------------------------------------------------------------------------------------------------------------------------------------------------------------------------------------------------------------------------------------------------------------------------------------------------------------------------------------------------------------------------------------------------------------------------------------------------------------------------------------------------------------------------------------------------------------------------------------------------------------------------------------------------------------------------------------|
|                                                                                                                                                                                                                                                          |                                            | <p>survival were summarized descriptively.</p>                                                                                                                                                                                         | <p>erlotinib were significantly longer, but there were also more deaths and interstitial lung disease-like syndrome related to this treatment.</p>                                                                                                                                                                                                                                                                                                                                                                                                                                                                                                                                                                  |                                                                                                                                                                                                                                                                                                                                                                                                                                                                                                                                                                                                                                                                                                                                                                                                                            |
| <p>Li Y (1), Sun J, Jiang Z, Zhang L, Liu G.</p> <p>Gemcitabine and S-1 combination (GS) chemotherapy versus gemcitabine (GEM) alone for locally advanced and metastatic pancreatic cancer: a meta-analysis of randomized controlled trials in Asia.</p> | <p>J Chemother. 2015 Aug;27(4):227-34.</p> | <p>Relevant trials were identified by searching databases. Five trials were selected in this article. The indicators we used were overall response rate, disease control rate, 1-year survival rate and haematological toxicities.</p> | <p>Meta-analysis of the pooled data demonstrated that the overall response rate (risk ratio, RR = 2.52, 95% confidence interval, CI: 1.85-3.42, P &lt; 0.00001) and disease control rate (RR = 1.24, 95% CI: 1.12-1.37, P &lt; 0.0001) were significantly different for the GS and GEM alone chemotherapies. Among the group of patients, 43.4% in the GS group and 31.4% in the GEM group survived more than a year. According to this, patients who use the GS regiment may have a better prognosis than the GEM regiment (RR = 1.62, 95% CI: 1.12-2.33, P = 0.04). The combination chemotherapy with GEM and S-1 group had higher haematological toxicities including neutropaenia (RR = 1.58, 95% CI: 1.17-</p> | <p>Overall response rate and disease control rate as well as 1-year survival rate in patients who received GS were superior to those treated with GEM alone. Combination chemotherapy with GEM and S-1 may offer greater benefits in the treatment of pancreatic cancer than GEM alone, although the GS group had higher haematological toxicities. Combination chemotherapy with GEM and S-1 might be an option of first-line chemotherapy for pancreatic cancer patients, at least in Asia. Mini Abstract: This systematic review analysing randomized controlled trials (RCTs) comparing S-1 combination chemotherapy versus GEM alone for locally advanced and metastatic pancreatic cancer demonstrated greater efficacy for S-1 combination in term of response, disease control and 1-year survival proportion.</p> |

| Author/Title                                                                                                                                                            | Journal                                   | Patient and Study Characteristics                                                                                                                                                                                                                                                                                                                                                                                                                                             | Results                                                                                                                                                                                                                                                                                                                                                                                                                                                                                                                                                                                                                                        | Conclusion                                                                                                                                                                                                                                                   |
|-------------------------------------------------------------------------------------------------------------------------------------------------------------------------|-------------------------------------------|-------------------------------------------------------------------------------------------------------------------------------------------------------------------------------------------------------------------------------------------------------------------------------------------------------------------------------------------------------------------------------------------------------------------------------------------------------------------------------|------------------------------------------------------------------------------------------------------------------------------------------------------------------------------------------------------------------------------------------------------------------------------------------------------------------------------------------------------------------------------------------------------------------------------------------------------------------------------------------------------------------------------------------------------------------------------------------------------------------------------------------------|--------------------------------------------------------------------------------------------------------------------------------------------------------------------------------------------------------------------------------------------------------------|
|                                                                                                                                                                         |                                           |                                                                                                                                                                                                                                                                                                                                                                                                                                                                               | 2.14, P = 0.003) and thrombocytopenia (RR = 1.85, 95% CI: 1.28-2.67, P = 0.001). The incidence of anaemia was much the same in the two groups (RR = 1.22, 95% CI: 0.87-1.70, P = 0.24).                                                                                                                                                                                                                                                                                                                                                                                                                                                        |                                                                                                                                                                                                                                                              |
| Sultana A(1), Smith CT, Cunningham D, Starling N, Neoptolemos JP, Ghaneh P.<br><br>Meta-analyses of chemotherapy for locally advanced and metastatic pancreatic cancer. | J Clin Oncol. 2007 Jun 20;25(18):2607-15. | There are a large number of randomized controlled trials involving chemotherapy in the management of advanced pancreatic cancer. Several chemotherapeutic agents, either alone or in combination with other chemotherapy or novel agents, have been used. The aim of these meta-analyses was to examine the different therapeutic approaches, and the comparisons examined were as follows: chemotherapy versus best supportive care; fluorouracil (FU) versus FU combination | One hundred thirteen randomized controlled trials were identified, of which 51 trials involving 9,970 patients met the inclusion criteria. Chemotherapy improved survival compared with best supportive care (hazard ratio [HR] = 0.64; 95% CI, 0.42 to 0.98). FU-based combination chemotherapy did not result in better overall survival compared with FU alone (HR = 0.94; 95% CI, 0.82 to 1.08). There was insufficient evidence of a survival difference between gemcitabine and FU, but the wide CI includes clinically important differences in both directions, making a clear conclusion difficult (HR = 0.75; 95% CI, 0.42 to 1.31). | There was a significant survival benefit for chemotherapy over best supportive care and gemcitabine combinations over gemcitabine alone. This supports the use of gemcitabine-based combination chemotherapy in the treatment of advanced pancreatic cancer. |

| Author/Title                                                                                                               | Journal                                                 | Patient and Study Characteristics                                                                                                                                                                                                                         | Results                                                                                                                                                                                                                                                                                                                                                                                                                                                                     | Conclusion                                                                                                                                                                                                                                                                                                                                                      |
|----------------------------------------------------------------------------------------------------------------------------|---------------------------------------------------------|-----------------------------------------------------------------------------------------------------------------------------------------------------------------------------------------------------------------------------------------------------------|-----------------------------------------------------------------------------------------------------------------------------------------------------------------------------------------------------------------------------------------------------------------------------------------------------------------------------------------------------------------------------------------------------------------------------------------------------------------------------|-----------------------------------------------------------------------------------------------------------------------------------------------------------------------------------------------------------------------------------------------------------------------------------------------------------------------------------------------------------------|
|                                                                                                                            |                                                         | <p>chemotherapy; gemcitabine versus FU; and gemcitabine versus gemcitabine combination chemotherapy. Relevant trials were identified by searching databases, trial registers, and conference proceedings. The primary end point was overall survival.</p> | <p>Survival was improved after gemcitabine combination chemotherapy compared with gemcitabine alone (HR = 0.91; 95% CI, 0.85 to 0.97).</p>                                                                                                                                                                                                                                                                                                                                  |                                                                                                                                                                                                                                                                                                                                                                 |
| <p>Ying JE(1), Zhu LM, Liu BX.</p> <p>Developments in metastatic pancreatic cancer: is gemcitabine still the standard?</p> | <p>World J Gastroenterol. 2012 Feb 28;18(8):736-45.</p> | <p>In the past 15 years, we have seen few therapeutic advances for patients with pancreatic cancer, which is the fourth leading cause of cancer-related death in the United States.</p>                                                                   | <p>Currently, only about 6% of patients with advanced disease respond to standard gemcitabine therapy, and median survival is only about 6 months. Moreover, phase III trials have shown that adding various cytotoxic and targeted chemotherapeutic agents to gemcitabine has failed to improve overall survival, except in cases in which gemcitabine combined with erlotinib show minimal survival benefit. Several meta-analyses have shown that the combination of</p> | <p>Strikingly, a phase III trial in 2010 showed that, in comparison to gemcitabine alone, the FOLFIRINOX regimen in patients with advanced disease and good performance status, produced better median overall survival, median progression-free survival, and objective response rates. This regimen also resulted in greater, albeit manageable toxicity.</p> |



| Author/Title                                                                                                                                                                                                   | Journal                                 | Patient and Study Characteristics                                                                                                                                                                                                                                                                                              | Results                                                                                                                                                                                                                                                                                                                                                                                                                                                                    | Conclusion                                                                                                                                                                                                                                                                              |
|----------------------------------------------------------------------------------------------------------------------------------------------------------------------------------------------------------------|-----------------------------------------|--------------------------------------------------------------------------------------------------------------------------------------------------------------------------------------------------------------------------------------------------------------------------------------------------------------------------------|----------------------------------------------------------------------------------------------------------------------------------------------------------------------------------------------------------------------------------------------------------------------------------------------------------------------------------------------------------------------------------------------------------------------------------------------------------------------------|-----------------------------------------------------------------------------------------------------------------------------------------------------------------------------------------------------------------------------------------------------------------------------------------|
|                                                                                                                                                                                                                |                                         |                                                                                                                                                                                                                                                                                                                                | <p>gemcitabine with either a platinum analog or capecitabine may lead to clinically relevant survival prolongation, especially for patients with good performance status. Meanwhile, many studies have focused on the pharmacokinetic modulation of gemcitabine by fixed-dose administration, and metabolic or transport enzymes related to the response and toxicity of gemcitabine.</p>                                                                                  |                                                                                                                                                                                                                                                                                         |
| <p>Banu E(1), Banu A, Fodor A, Landi B, Rougier P, Chatellier G, Andrieu JM, Oudard S.</p> <p>Meta-analysis of randomised trials comparing gemcitabine-based doublets versus gemcitabine alone in patients</p> | <p>Drugs Aging. 2007;24(10):865-79.</p> | <p>We conducted a systematic review and meta-analysis of published data on the use of gemcitabine-based doublets compared with gemcitabine alone in chemotherapy-naive patients with advanced and metastatic pancreatic cancer treated in randomised controlled phase II-III trials with overall survival as the principal</p> | <p>Gemcitabine-based doublets were associated with small but significant reductions in the risk of death at 6, 12 and 18 months of 8% (95% CI 3, 13), 4% (95% CI 2, 7) and 3% (95% CI 1, 5), respectively (p&lt;0.005 for all timepoints). No heterogeneity between studies was observed. Subgroup analyses showed an overall survival benefit for gemcitabine-based doublets in clinical trials testing the same planned dose intensity of gemcitabine in comparative</p> | <p>This meta-analysis of data obtained from randomised controlled phase II-III trials of patients with advanced pancreatic cancer showed a small but significant improvement in overall survival for patients receiving gemcitabine-based doublets compared with gemcitabine alone.</p> |

| Author/Title                                                                          | Journal                          | Patient and Study Characteristics                                                                                                                                                                                                                                                                                                                                                                                                                                                                                     | Results                                                                                                                                                                                                  | Conclusion                                                                                                                                                                                                                                                                                    |
|---------------------------------------------------------------------------------------|----------------------------------|-----------------------------------------------------------------------------------------------------------------------------------------------------------------------------------------------------------------------------------------------------------------------------------------------------------------------------------------------------------------------------------------------------------------------------------------------------------------------------------------------------------------------|----------------------------------------------------------------------------------------------------------------------------------------------------------------------------------------------------------|-----------------------------------------------------------------------------------------------------------------------------------------------------------------------------------------------------------------------------------------------------------------------------------------------|
| with advanced and metastatic pancreatic cancer.                                       |                                  | or secondary endpoint. To this end, a literature search was performed using Cochrane methodology. The relative risks with 95% confidence intervals were estimated based on adjusted number of deaths and patients at risk according to the extent of follow-up and censoring. Twenty-three randomised clinical trials including 5886 patients met the inclusion criteria. In these trials, 2932 patients were randomly assigned to receive gemcitabine-based doublets and 2954 patients to receive gemcitabine alone. | arms, using platinum salt-based protocols and with survival as the primary endpoint.                                                                                                                     |                                                                                                                                                                                                                                                                                               |
| Zagouri F(1), Sergeantanis TN, Chrysikos D, Zografos CG, Papadimitriou CA, Dimopoulos | Pancreas. 2013 Jul;42(5):760-73. | This is the first systematic review of the literature to synthesize all available data coming from trials and evaluate the efficacy and safety of                                                                                                                                                                                                                                                                                                                                                                     | The search strategy retrieved 439 articles. Of these articles, 237 were irrelevant, 113 were reviews, and 21 were case reports. After searching the references of all reviews and remaining articles, 29 | Regarding the evaluation of molecular targeted therapies in pancreatic cancer, it should be stressed that although multiple agents have been tested, only 9 phase 3 trials have been conducted and one agent (erlotinib) has been approved by FDA for use in clinical practice. Nevertheless, |

| Author/Title                                                                                                                  | Journal | Patient and Study Characteristics                                                 | Results                                                                                                                              | Conclusion                                                                                                                                                                                                                                                                                                                                                                                                                                                                                                                                                                                                                                                                                                                                                                                                                                                                                                                                                                                            |
|-------------------------------------------------------------------------------------------------------------------------------|---------|-----------------------------------------------------------------------------------|--------------------------------------------------------------------------------------------------------------------------------------|-------------------------------------------------------------------------------------------------------------------------------------------------------------------------------------------------------------------------------------------------------------------------------------------------------------------------------------------------------------------------------------------------------------------------------------------------------------------------------------------------------------------------------------------------------------------------------------------------------------------------------------------------------------------------------------------------------------------------------------------------------------------------------------------------------------------------------------------------------------------------------------------------------------------------------------------------------------------------------------------------------|
| <p>MA, Filipits M, Bartsch R.</p> <p>Molecularly targeted therapies in metastatic pancreatic cancer: a systematic review.</p> |         | <p>molecular targeted drugs in unresectable and metastatic pancreatic cancer.</p> | <p>conference abstracts and 15 PubMed articles were also included. Overall, 112 studies were eligible for the systematic review.</p> | <p>erlotinib has exhibited modest results, as the gain in survival was only 0.4 months. However, molecularly targeted agents seem to mark the beginning of a new era in the context of unresectable and metastatic pancreatic cancer. It would be tempting to hypothesize an analogy in developments after the introduction of imatinib for the treatment of gastrointestinal stromal tumors. In any event, as molecular profiling surpasses the borders of morphological classifications, direct consequent molecularly targeted therapy may well contribute to the individualization of treatment in the challenging group of patients with metastatic/unresectable pancreatic cancer. It is thus anticipated that better selection of patients at the individual level will contribute to sizably better performance of the newly developed and explored molecularly targeted agents. Of great importance seems to be IGF1R monoclonal antibody inhibitors, which have entered phase 3 trials.</p> |

### **Data Supplement 3: Literature Search Strategy for Pancreatic Cancer (Potentially Curable, Locally Advanced, Unresectable and Metastatic) and Health Disparities for Pancreatic Cancer**

Computerized literature searches of MEDLINE and the Cochrane Collaboration Library were performed. The searches of the English-language literature published from January 2000 to June 2015 combined pancreatic neoplasm terms and follow-up-related terms and MeSH headings. Results of the databases searches were supplemented with hand searching of the bibliographies of systematic reviews and selected seminal articles, and contributions from Expert Panel members' personal files.

#### **Disease and Treatments**

Search: ("carcinoma, pancreas"[MeSH Terms] OR ((cancer[TIAB] OR neoplasm[TIAB] OR neoplasms[TIAB] OR tumor[TIAB] OR tumors[TIAB] OR tumour[TIAB] OR tumours[TIAB] OR malignant[TIAB] OR malignancy[TIAB] OR malignancies[TIAB] OR carcinoma[TIAB] OR carcinomas[TIAB] OR carcinomatosis[TIAB] OR carcinomatoses[TIAB] OR adenocarcinoma[TIAB] OR adenocarcinomas[TIAB] OR oncology[TIAB] AND ("pancreas"[MeSH Terms] OR "pancreatic"[TIAB])) AND "palliative care"[MeSH Terms] AND ("critical illness"[MeSH Terms] OR "home care services"[MeSH Terms] OR "hospitalization"[MeSH Terms] OR "hospices"[MeSH Terms] OR "terminal care"[MeSH Terms] OR "advance care planning"[MeSH Terms] OR "terminally ill"[MeSH Terms] OR "patient care team"[MeSH Terms] OR "quality of life"[MeSH Terms] OR ("depressive disorder"[MeSH Terms] OR "depression"[MeSH Terms])) AND ((randomized controlled trial[pt] OR controlled clinical trial[pt] OR "randomized controlled trials as topic"[MeSH Terms] OR clinical trial[pt] OR "clinical trial"[tiab] OR "clinical trials"[tiab] OR "clinical trials as topic"[MeSH Terms] OR "controlled clinical trials as topic"[MeSH Terms] OR "randomized controlled trials as topic"[MeSH Terms] OR "clinical trials, phase ii as topic"[MeSH Terms] OR "clinical trials, phase iii as topic"[MeSH Terms] OR "clinical trials, phase iv as topic"[MeSH Terms] OR clinical trial, phase II[pt] OR clinical trial, phase III[pt] OR clinical trial, phase IV[pt] OR "random allocation"[MeSH Terms] OR "random allocation"[tiab] OR "randomly allocated"[tiab] OR "double-blind method"[MeSH Terms] OR "single-blind method"[MeSH Terms]) OR ((random[tiab] OR randomly[tiab] OR randomized[tiab] OR randomised[tiab] OR randomization[tiab] OR randomisation[tiab]) AND (clinical[tiab] OR control[tiab] OR controlled[tiab] OR "control groups"[MeSH Terms])) OR ((single[tiab] OR single-[tiab] OR double[tiab] OR double-[tiab] OR triple[tiab] OR triple-[tiab] OR multi[tiab] OR multi-[tiab] OR evaluator[tiab] OR assessor[tiab] OR interviewer[tiab]) AND (mask[tiab] OR masked[tiab] OR masking[tiab] OR blind[tiab] OR blinded[tiab] OR blinding[tiab])) OR (("placebos"[MeSH Terms] OR placebo[tiab] OR placebos[tiab] OR random[tiab] OR randomly[tiab] OR randomized[tiab] OR randomised[tiab] OR randomization[tiab] OR randomization[tiab]) AND ("research design"[MeSH Terms] OR "comparative study"[tiab] OR comparative study[pt] OR "evaluation studies as topic"[MeSH Terms:noexp] OR evaluation studies[pt] OR "evaluation study"[tiab] OR "evaluation studies"[tiab] OR "validation studies as topic"[MeSH Terms] OR "follow-up studies"[MeSH Terms] OR "follow-up study"[tiab] OR "follow up study"[tiab] OR "follow-up studies"[tiab] OR "follow up studies"[tiab] OR "prospective studies"[MeSH Terms] OR prospective[tiab] OR "epidemiologic research design"[MeSH Terms] OR "epidemiologic

methods"[MeSH Terms] OR "epidemiologic study characteristics as topic"[MeSH Terms] OR "epidemiologic studies"[MeSH Terms] OR "intervention studies"[MeSH Terms] OR "cross-over studies"[MeSH Terms])) NOT (clinical trial, phase I[pt] OR "clinical trials, phase I as topic"[MeSH Terms]) NOT ("animals"[MeSH Terms] NOT "humans"[MeSH Terms]) NOT review[pt] AND English[la] AND (2002/04/01[PDAT] : 2015/06/01[PDAT])

## **Health Disparities**

(pancreatic cancer treatment) AND (((delivery of health care[MeSH:noexp] OR health behavior[MH] OR health knowledge, attitudes, practice[MH] OR health services accessibility[MH] OR health services, indigenous[MH] OR mass screening[MH] OR mass screening[TIAB] OR mass screenings[TIAB] OR health inequality[TIAB] OR health inequalities[TIAB] OR health inequities[TIAB] OR health inequity[TIAB] OR health services needs and demand[MH] OR patient acceptance of health care[MH] OR patient selection[MH] OR quality of health care[MAJR:noexp] OR quality of life[MH] OR quality of life[TIAB] OR social disparities[TIAB] OR social disparity[TIAB] OR social inequities[TIAB] OR social inequity[TIAB] OR Socioeconomic Factors[MAJR] OR socioeconomic factor[TIAB] OR socioeconomic factors[TIAB]) AND (African American[TIAB] OR African Americans[TIAB] OR African ancestry[TIAB] OR African Continental Ancestry Group[MH] OR AIAN[TIAB] OR American Native Continental Ancestry Group[MH] OR Asian continental ancestry group[MH] OR Asian[TIAB] OR Asians[TIAB] OR black[TIAB] OR blacks[TIAB] OR Caucasian[TIAB] OR Caucasians[TIAB] OR diverse population[TIAB] OR diverse populations[TIAB] OR environmental justice[TIAB] OR ethnic group[TIAB] OR ethnic groups[MH] OR ethnic groups[TIAB] OR ethnic population[TIAB] OR ethnic populations[TIAB] OR ghetto[TIAB] OR ghettos[TIAB] OR Hispanic[TIAB] OR Hispanics[TIAB] OR Indian[TIAB] OR Indians[TIAB] OR Latino[TIAB] OR Latinos[TIAB] OR Latina[TIAB] OR Latinas[TIAB] OR medically underserved area[MH] OR minority group[TIAB] OR minority groups[MH] OR minority groups[TIAB] OR minority population[TIAB] OR minority populations[TIAB] OR Native American[TIAB] OR Native Americans[TIAB] OR Oceanic Ancestry Group[MH] OR pacific islander[TIAB] OR pacific islanders[TIAB] OR people of color[TIAB] OR poverty area[MH] OR poverty area[TIAB] OR poverty areas[TIAB] OR rural health[MH] OR rural health[TIAB] OR rural health services[MH] OR rural population[MH] OR rural population[TIAB] OR rural populations[TIAB] OR slum[TIAB] OR slums[TIAB] OR urban health[MH] OR urban health services[MH] OR urban population[MH] OR urban population[TIAB] OR urban populations[TIAB] OR vulnerable populations[MH] OR vulnerable population[TIAB] OR vulnerable populations[TIAB] OR white[TIAB] OR whites[TIAB]) OR (ethnic disparities[TIAB] OR ethnic disparity[TIAB] OR health care disparities[TIAB] OR health care disparity[TIAB] OR health disparities[TIAB] OR health disparity[TIAB] OR health status disparities[MH] OR healthcare disparities[MH] OR healthcare disparities[TIAB] OR healthcare disparity[TIAB] OR minority health[MH] OR minority health[TIAB] OR racial disparities[TIAB] OR racial disparity[TIAB] OR racial equality[TIAB] OR racial equity[TIAB] OR racial inequities[TIAB] OR racial inequity[TIAB]))

OR sexual orientation[TIAB] OR sexual identity[TIAB] OR institutional racism[TIAB] OR disability[TIAB] OR special health care needs[TIAB] OR health differences[TIAB] OR social disadvantage[TIAB] OR economic disadvantage[TIAB] OR social obstacles to health[TIAB] OR economic obstacles to health[TIAB] OR social hierarchy[TIAB] OR unequal distribution[TIAB] OR ((ethnic\*[tw] OR race[tw] OR racial[tw] OR disparity[tw] OR disparities[tw] OR blacks[tw] OR black[tw] OR Hispanic\*[tw]) OR (population groups[mh] OR race relations[mh]))))

**Data Supplement 4: Quorum Diagram**

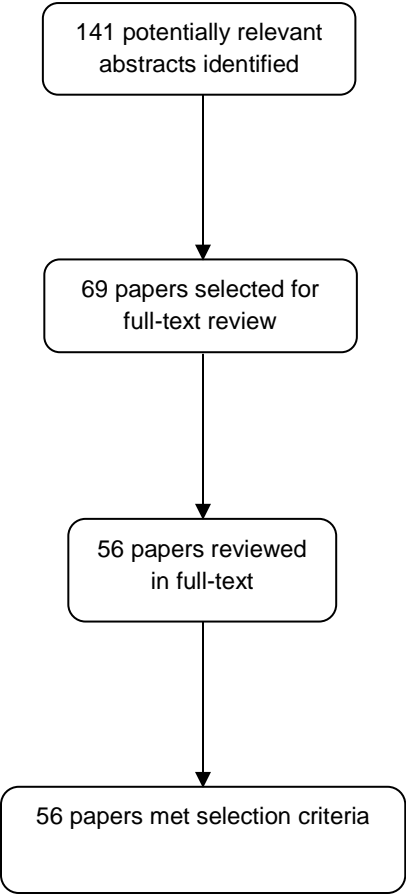

## **Data Supplement 5: World Health Organization Definition of Palliative Care<sup>1</sup>**

The World Health Organization has developed this definition of palliative care:

Palliative care is an approach that improves the quality of life of people with localized pancreatic cancer and their families facing the problems associated with life-threatening illness, through the prevention and relief of suffering by means of early identification and impeccable assessment and treatment of pain and other problems, physical, psychosocial and spiritual.

Palliative care:

- provides relief from pain and other distressing symptoms;
- affirms life and regards dying as a normal process;
- intends neither to hasten or postpone death;
- integrates the psychological and spiritual aspects of people with localized pancreatic cancer care;
- offers a support system to help people with localized pancreatic cancer live as actively as possible until death;
- offers a support system to help the family cope during the people with localized pancreatic cancer illness and in their own bereavement;
- uses a team approach to address the needs of people with localized pancreatic cancer and their families, including bereavement counseling, if indicated;
- will enhance quality of life, and may also positively influence the course of illness;
- is applicable early in the course of illness, in conjunction with other therapies that are intended to prolong life, such as surgery and chemotherapy, and includes those investigations needed to better understand and manage distressing clinical complications.



## Data Supplement 6: Pancreatic Protocol Computerized Tomography (CT) <sup>2,3</sup>

To assess resectability and staging, a pancreatic protocol CT or CT angiography is performed. To perform the CT angiography:

- Bolus administration of iodinated nonionic contrast
- Imaging in arterial and venous phases
- First 30 seconds (arterial phase), maximizes attenuation of celiac axis, superior mesenteric artery, and peripancreatic arteries
- 60 to 70 seconds after start of the contrast injection (portal venous phase) provides enhancement for imaging of superior mesenteric vein, splenic and portal veins
- Portal venous phase also provides enhancement for imaging of pancreas and liver metastases
- 70 to 80 seconds after contrast injection (hepatic phase) provides enhancement for imaging of additional liver metastases

## References

1. World Health Organization Definition of Palliative Care: Definition of Palliative Care, <http://www.who.int/cancer/palliative/definition/en/>, 2015
2. Tummala P, Junaidi O, Agarwal B: Imaging of pancreatic cancer: An overview. J Gastrointest Oncol 2:168-174, 2011
3. Wong JC, Lu DS: Staging of pancreatic adenocarcinoma by imaging studies. Clin Gastroenterol Hepatol 6:1301-1308, 2008
