# Supplementary material
Source: PubMed Central journal article supplement (PMC5019760)
Supplement: supp_JCO.2016.67.1412_MS_2016.671412.pdf [file supp_JCO.2016.67.1412_MS_2016.671412.pdf]

# ASCO | GUIDELINES™

## Methodology Supplement

### Pancreatic Cancer: American Society of Clinical Oncology Clinical Practice Guideline

#### TABLE OF CONTENTS

1. **OVERVIEW: GENERAL PRINCIPLES FOR ALL ASCO GUIDELINE PRODUCTS** (e.g. de novo, Update, Endorsement, Adaptation, Provisional Clinical Opinion, Update Review)
  - Panel Composition
  - Guideline Development Process
  - Revisions – The SIGNALS Approach to Guideline Updating
  - Systematic Literature Review
  - Literature Search Strategy
  - Data Extraction
2. **DEVELOPMENT OF RECOMMENDATIONS**
  - BRIDGE-Wiz Steps with Examples
  - Study Quality Assessment Tables
  - Guide for Types of Recommendations
  - Guide for Rating Strength of Recommendations
  - Guide for Rating Strength of Evidence
  - Guide for Rating Potential for Bias
3. **OVERVIEW OF THE GUIDELINE ENDORSEMENT PROCESS**
4. **OVERVIEW OF THE GUIDELINE ADAPTATION PROCESS**
5. **OVERVIEW OF THE PROVISIONAL CLINICAL OPINION PROCESS**

#### FIGURES

- Figure 1: Sample Expert Content Review Matrix for Guideline Updating Assessment
- Figure 2: Sample Summary Table for ASCO Guideline Updating Needs Assessment
- Figure 3: ASCO Guideline Endorsement Content Review Form
- Figure 4: Rigour of Development Subscale of the Appraisal of Guidelines for Research and Evaluation II Instrument

#### REFERENCES

## **1. OVERVIEW: GENERAL PRINCIPLES FOR ALL ASCO GUIDELINE PRODUCTS ( e.g. de novo, Update, Endorsement, Adaptation, Provisional Clinical Opinion, Non-substantive Brief Update)**

Clinical practice guidelines are systematically developed statements that assist practitioners and patients in making decisions about care. Attributes of good guidelines include validity, reliability, reproducibility, clinical applicability, flexibility, clarity, multidisciplinary process, review of evidence, and documentation. Guidelines may be useful in producing better care and decreasing cost. Specifically, utilization of clinical guidelines may provide:

1. Improvements in outcomes
2. Improvements in medical practice
3. A means for minimizing inappropriate practice variation
4. Decision support tools for practitioners
5. Points of reference for medical orientation and education
6. Criteria for self-evaluation
7. Indicators and criteria for external quality review
8. Assistance with reimbursement and coverage decisions
9. Criteria for use in credentialing decisions
10. Identification of areas where future research is needed

### ***Panel Composition***

The ASCO Clinical Practice Guidelines Committee (CPGC) convened an Expert Panel] with multidisciplinary representation in medical oncology, radiation oncology, surgical oncology, pathology, community oncology, patient/advocacy representation, and guideline implementation. The Expert Panel was led by two Co-Chairs who had primary responsibility for the development and timely completion of the guideline. The Expert Panel members are listed in Appendix Table A1 (online only).

### ***Guideline Development Process***

The Expert Panel met via webinar) on several occasions and corresponded frequently through e-mail; progress on guideline development was driven primarily by the Co-Chairs along with ASCO staff. The purpose of the meetings was for members to contribute content, provide critical review, interpret evidence, and finalize the guideline recommendations based upon the consideration of the evidence. All members of the Expert Panel participated in the preparation of the draft guideline document, which was then disseminated for external review and submitted to the *Journal of Clinical Oncology (JCO)* for peer review and consideration for publication. All ASCO guidelines are reviewed and approved by the ASCO Clinical Practice Guidelines Committee prior to publication.

## ***Revisions - The SIGNALS Approach to Guideline Updating***

At annual intervals, the Update Committee Co-Chairs and two Committee members designated by the Co-Chairs will determine the need for revisions to the guideline based on an examination of current literature. If necessary, an Update Committee will be (re)convened to discuss potential changes. When appropriate, the Committee will recommend revised guidelines to the Clinical Practice Guidelines Committee (CPGC) for review and approval.

The ASCO CPGC's Methods Subcommittee approved use of a "signals" approach to facilitate guideline updating. This approach outlines formal criteria for identifying new, practice-changing data—signals—that might translate into revised practice recommendations.

The threshold for embarking on ASCO guideline updates that translate into new or revised recommendations—the presence of a signal in the literature—is high. Two major categories of changes are recognized as potential signals:

- A potentially invalidating change in evidence: opposing findings, evidence of substantial harm, evidence of a superior new treatment; and
- A major change in evidence: important changes in efficacy but not opposing findings, expansion of treatment such as evidence of efficacy in a new population, important caveat.
- Of note, there can be reasons other than the scientific literature to initiate a guideline update, including regulatory decisions that affect existing practice recommendations and can require rapid, ad hoc updates.

As described in the following steps, the signals approach relies on a combination of literature searching and expert opinion to inform the need for guideline updating.

### *Step 1: Reviewing the protocol that was used for the previous systematic review.*

Panel leadership, in consultation with other content experts if needed, should review the currency and validity of the guideline clinical questions, target population, interventions, and outcomes. If any of these components of the protocol are out-of-date, the protocol should be revised by the Panel leadership prior to the literature review.

### *Step 2: Completing the formal literature review and seeking panel input.*

Staff members conduct annual literature searches and review the search yield in consultation with the panel leadership to identify—or to rule out—signals for updating a guideline. The sources to mine for signals in the published literature include (a) PDQ information summaries, (b) PubMed, and (c) the National Guideline Clearinghouse. The results of the literature search and the initial determination regarding the presence or absence of signals are distributed to the Update Panel for comment. Panel leadership may also choose to survey the Update Panel regarding the presence or absence of signals (see Figures 1 and 2).

### *Step 3: Choosing the updating option.*

Panel leadership makes the final decision on the type of guideline update to issue.

There are three basic updating options:

1. An updated review that is defined by no new or revised recommendations and that is submitted to the *Journal of Clinical Oncology* (JCO) as a brief report. Prior to publication, the report is reviewed and approved by the leadership of the ASCO Clinical Practice Guidelines Committee (CPGC).
2. A quick, focused e-update that includes new and/or revised recommendations is posted on the guideline Wiki that is followed by a rapid JCO print update (the proposed “expedited, focused update” that is approved by a subset of the CPGC).
3. A more traditional and comprehensive ASCO guideline update that is defined by new and/or revised recommendations and is published in the JCO following conventional CPGC review and approval.

*Step 4: Labeling the guideline status.*

Staff will label the resulting update on the Wiki site using the following designations: archived, current, update in progress.

### ***Systematic Literature Review***

ASCO guidelines are based on systematic reviews of the literature. A protocol for each systematic review defines parameters for a targeted literature search. Additional parameters include relevant study designs, literature sources, types of reports, and pre-specified inclusion and exclusion criteria for literature identified. The protocol for this guideline was reviewed and approved by the ASCO Clinical Practice Guidelines Committee’s Gastrointestinal Cancer Guideline Advisory Group (GAG).

### ***Literature Search Strategy***

PubMed and the Cochrane Collaboration Library electronic databases were searched for evidence reporting on outcomes of interest. Further details on the search strategy and results are provided in Data Supplements 3 and 4.

### ***Data Extraction***

Literature search results were reviewed and deemed appropriate for full text review by two ASCO staff reviewers in consultation with the Expert Panel Co-Chairs. Data were extracted by two staff reviewers and subsequently checked for accuracy through an audit of the data by another ASCO staff member. Disagreements were resolved through discussion and consultation with the Co-Chairs if necessary. Evidence tables are provided in Data Supplements 1 and 2.

## 2. DEVELOPMENT OF RECOMMENDATIONS

The guideline recommendations were crafted, in part, using the GuideLines Into DEcision Support (GLIDES) methodology and accompanying BRIDGE-Wiz software™. This method helps guideline panels systematically develop clear, translatable, and implementable recommendations using natural language, based on the evidence and assessment of its quality to increase usability for end users. The process incorporates distilling the actions involved, identifying who will carry them out, to whom, under what circumstances, and clarifying if and how end users can carry out the actions consistently. This process helps the Panel focus the discussion, avoid using unnecessary and/or ambiguous language, and clearly state its intentions.

### ***BRIDGE-Wiz Steps with Examples***

| Step # | Step                                                                                                                                                                                                                                                                                                                                               |
|--------|----------------------------------------------------------------------------------------------------------------------------------------------------------------------------------------------------------------------------------------------------------------------------------------------------------------------------------------------------|
| 1      | Choose action type<br><b>Example:</b> Prescribe                                                                                                                                                                                                                                                                                                    |
| 2      | Based on the action type, select verb<br><b>Example:</b> Administer AND use                                                                                                                                                                                                                                                                        |
| 3      | Administer and use <b>what?</b> (verb object) [n.b., users can add more than one verb and object(s). The verb “consider” is disallowed.]<br><b>Example:</b> administer combination of two cytotoxic drugs AND use platinum combinations                                                                                                            |
| 4      | Check if the actions are specific and unambiguously written (Executability)<br><b>Example:</b> Modify if necessary                                                                                                                                                                                                                                 |
| 5      | Define <b>When</b> (under what conditions)<br><b>Example:</b> Patients who not previously been treated for metastatic NSCLC                                                                                                                                                                                                                        |
| 6      | Add other conditions with AND or OR<br><b>Example:</b> AND Have ECOG PS 0 or 1 AND do not have contraindications to platinum agents                                                                                                                                                                                                                |
| 7      | Check if users will be able to consistently the circumstances (Decidability) – modify if needed<br><b>Example:</b> Add language if necessary, e.g. list contraindications                                                                                                                                                                          |
| 8      | Enter potential <b>benefits</b> for each Action ( <i>What are the anticipated benefits of administering two cytotoxic drugs IF patients have not been previously treated for metastatic NSCLC AND don't have contraindications to platinum drugs</i> )<br><b>Example:</b> improvement in radiologic response rate, improvement in overall survival |

|                                                                                     |                                                                                                                                                                                                                                                                                                                                                                                                                                                                                                      |                                                                                     |                     |
|-------------------------------------------------------------------------------------|------------------------------------------------------------------------------------------------------------------------------------------------------------------------------------------------------------------------------------------------------------------------------------------------------------------------------------------------------------------------------------------------------------------------------------------------------------------------------------------------------|-------------------------------------------------------------------------------------|---------------------|
| 9                                                                                   | <p>Enter potential <b>risks, harms and costs</b> for each Action (<i>What are the anticipated risks, harms and costs of administering two cytotoxic drugs IF patients have not been previously treated for metastatic NSCLC AND Have ECOG PS 0 or 1 AND don't have contraindications to platinum drugs</i>)</p> <p><b>Example:</b> List toxicities</p>                                                                                                                                               |                                                                                     |                     |
| 10                                                                                  | <p><b>Judge benefit-harms balance</b> (Options: Equilibrium, Preponderance of Risks, Harms, Costs, Preponderance of Benefits)</p> <p><b>Example:</b> Preponderance of Benefits</p>                                                                                                                                                                                                                                                                                                                   |                                                                                     |                     |
| 11                                                                                  | <table border="1" style="width: 100%;"> <tr> <td data-bbox="277 527 1143 617">Select <b>Aggregate Evidence Quality</b> (High, Intermediate, Low, or Insufficient)</td> <td data-bbox="1143 527 1430 617">High</td> </tr> </table>                                                                                                                                                                                                                                                                    | Select <b>Aggregate Evidence Quality</b> (High, Intermediate, Low, or Insufficient) | High                |
| Select <b>Aggregate Evidence Quality</b> (High, Intermediate, Low, or Insufficient) | High                                                                                                                                                                                                                                                                                                                                                                                                                                                                                                 |                                                                                     |                     |
| 12                                                                                  | <p>BRIDGE-Wiz proposes <b>recommendation strength</b> (options: Strong, Moderate, Weak) and term for the <b>level of obligation</b> (options: Must, Should, May)</p> <p><b>Example 1:</b> Based on the Quality of Evidence <b>High</b> AND <b>Preponderance of Benefit</b> this key action statement can have a Recommendation Strength of <b>Strong</b>.</p> <p><b>Example 2:</b> Based on this, the level of obligation should be Must or Should (choose one): <b>Should</b></p>                   |                                                                                     |                     |
| 13                                                                                  | <table border="1" style="width: 100%;"> <tr> <td data-bbox="277 863 1143 911">Define <b>who</b></td> <td data-bbox="1143 863 1430 911">Oncology clinicians</td> </tr> </table>                                                                                                                                                                                                                                                                                                                       | Define <b>who</b>                                                                   | Oncology clinicians |
| Define <b>who</b>                                                                   | Oncology clinicians                                                                                                                                                                                                                                                                                                                                                                                                                                                                                  |                                                                                     |                     |
| 14                                                                                  | <p>Choose a recommendation style from 4 options (n.b., can edit)</p> <p><b>Example:</b> If patients have not received treatment yet for metastatic NSCLC AND have an ECOG PS 0 or 1</p> <p>Then</p> <p>Oncology clinicians should administer combination of two cytotoxic drugs (Evidence quality: High; Recommendation strength: Strong) AND oncologists should use platinum combinations, except if patients have contraindications. (Evidence quality: High; Recommendation strength: Strong)</p> |                                                                                     |                     |
| 15                                                                                  | <p>BRIDGE-Wiz generates an Evidence Profile, includes "Key Action Statement," "Aggregate Evidence Quality," "Benefits," "Risk, Harm, Cost," and "Benefit-Harm Assessment" for each "Action" and places to insert "Value Judgments," "Intentional Vagueness," "Role of Patient Preferences," "Exclusions", and "Notes"</p>                                                                                                                                                                            |                                                                                     |                     |

## Study Quality Assessment

Study quality was formally assessed for the studies identified. Design aspects related to the individual study quality were assessed by one reviewer and included factors such as blinding, allocation concealment, placebo control, intention to treat, funding sources, etc. The risk of bias is assessed as “low,” “intermediate,” or “high” for most of the identified evidence.

### Guide for Types of Recommendations

| Type of Recommendation    | Definition                                                                                                                                                                                                                                                                                                                                                                                                                                                                                          |
|---------------------------|-----------------------------------------------------------------------------------------------------------------------------------------------------------------------------------------------------------------------------------------------------------------------------------------------------------------------------------------------------------------------------------------------------------------------------------------------------------------------------------------------------|
| <b>Evidence based</b>     | There was sufficient evidence from published studies to inform a recommendation to guide clinical practice.                                                                                                                                                                                                                                                                                                                                                                                         |
| <b>Formal consensus</b>   | The available evidence was deemed insufficient to inform a recommendation to guide clinical practice. Therefore, the Expert Panel used a formal consensus process to reach this recommendation, which is considered the best current guidance for practice. The Panel may choose to provide a rating for the strength of the recommendation (ie, “strong,” “moderate,” or “weak”). The results of the formal consensus process are summarized in the guideline and reported in the Data Supplement. |
| <b>Informal consensus</b> | The available evidence was deemed insufficient to inform a recommendation to guide clinical practice. The recommendation is considered the best current guidance for practice, based on informal consensus of the Expert Panel. The Panel agreed that a formal consensus process was not necessary for reasons described in the literature review and discussion. The Panel may choose to provide a rating for the strength of the recommendation (ie, “strong,” “moderate,” or “weak”).            |
| <b>No recommendation</b>  | There is insufficient evidence, confidence, or agreement to provide a recommendation to guide clinical practice at this time. The Panel deemed the available evidence as insufficient and concluded it was unlikely that a formal consensus process would achieve the level of agreement needed for a recommendation.                                                                                                                                                                               |

## Guide for Strength of Recommendations

| Rating for Strength of Recommendation | Definition                                                                                                                                                                                                                                                                                                                                                                                                                                                               |
|---------------------------------------|--------------------------------------------------------------------------------------------------------------------------------------------------------------------------------------------------------------------------------------------------------------------------------------------------------------------------------------------------------------------------------------------------------------------------------------------------------------------------|
| <b>Strong</b>                         | There is high confidence that the recommendation reflects best practice. This is based on (1) strong evidence for a true net effect (eg, benefits exceed harms); (2) consistent results, with no or minor exceptions; (3) minor or no concerns about study quality; and/or (4) the extent of panelists' agreement. Other compelling considerations (discussed in the guideline's literature review and analyses) may also warrant a strong recommendation.               |
| <b>Moderate</b>                       | There is moderate confidence that the recommendation reflects best practice. This is based on (1) good evidence for a true net effect (eg, benefits exceed harms); (2) consistent results, with minor and/or few exceptions; (3) minor and/or few concerns about study quality; and/or (4) the extent of panelists' agreement. Other compelling considerations (discussed in the guideline's literature review and analyses) may also warrant a moderate recommendation. |
| <b>Weak</b>                           | There is some confidence that the recommendation offers the best current guidance for practice. This is based on (1) limited evidence for a true net effect (eg, benefits exceed harms); (2) consistent results, but with important exceptions; (3) concerns about study quality; and/or (4) the extent of panelists' agreement. Other considerations (discussed in the guideline's literature review and analyses) may also warrant a weak recommendation.              |



### Guide for Rating Quality of Evidence

| <b>Rating for Strength of Evidence</b> | <b>Definition</b>                                                                                                                                                                                                                                      |
|----------------------------------------|--------------------------------------------------------------------------------------------------------------------------------------------------------------------------------------------------------------------------------------------------------|
| <b>High</b>                            | High confidence that the available evidence reflects the true magnitude and direction of the net effect (i.e., balance of benefits v harms) and that further research is very unlikely to change either the magnitude or direction of this net effect. |
| <b>Intermediate</b>                    | Moderate confidence that the available evidence reflects the true magnitude and direction of the net effect. Further research is unlikely to alter the direction of the net effect; however, it might alter the magnitude of the net effect.           |
| <b>Low</b>                             | Low confidence that the available evidence reflects the true magnitude and direction of the net effect. Further research may change either the magnitude and/or direction this net effect.                                                             |
| <b>Insufficient</b>                    | Evidence is insufficient to discern the true magnitude and direction of the net effect. Further research may better inform the topic. The use of the consensus opinion of experts is reasonable to inform outcomes related to the topic.               |

## Guide for Rating of Potential for Bias

| Rating of Potential for Bias | Definitions for Rating Potential for Risk of Bias in Randomized Controlled Trials                                                                                                                                                                                                                                                                                                                                                                                                                                      |
|------------------------------|------------------------------------------------------------------------------------------------------------------------------------------------------------------------------------------------------------------------------------------------------------------------------------------------------------------------------------------------------------------------------------------------------------------------------------------------------------------------------------------------------------------------|
| <b>Low risk</b>              | No major features in the study that risk biased results, and none of the limitations are thought to decrease the validity of the conclusions. The study avoids problems such as failure to apply true randomization, selection of a population unrepresentative of the target patients, high dropout rates, and no intention-to-treat analysis; and key study features are described clearly (including the population, setting, interventions, comparison groups, measurement of outcomes, and reasons for dropouts). |
| <b>Intermediate</b>          | The study is susceptible to some bias, but flaws are not sufficient to invalidate the results. Enough of the items introduce some uncertainty about the validity of the conclusions. The study does not meet all the criteria required for a rating of good quality, but no flaw is likely to cause major bias. The study may be missing information, making it difficult to assess limitations and potential problems.                                                                                                |
| <b>High risk</b>             | There are significant flaws that imply biases of various types that may invalidate the results. Several of the items introduce serious uncertainty about the validity of the conclusions. The study has serious errors in design, analysis, or reporting; large amounts of missing information; or discrepancies in reporting.                                                                                                                                                                                         |

### **3. OVERVIEW OF THE GUIDELINE ENDORSEMENT PROCESS**

In 2006, the ASCO Board of Directors approved a policy and a set of procedures for endorsing clinical practice guidelines that have been developed by other professional organizations. The goal of the endorsement policy is to increase the number of high-quality, ASCO-vetted guidelines available to the ASCO members. Endorsement of guidelines will be considered in selected circumstances, either upon request from related professional organizations at the discretion of the CPGC, or when ASCO seeks to endorse another organization's guideline in lieu of undertaking its own guideline on the same topic. Of note, guidelines considered for endorsement by ASCO are typically developed from established guideline development groups and are based on systematic reviews of the literature.

The guideline under endorsement consideration is reviewed and approved by the ASCO CPGC. The CPGC review includes two parts: content review and methodological review. The content review is completed by an ASCO Endorsement Panel (Figure 3: ASCO Guideline Endorsement Content Review Form). The Panel assesses the perceived clarity and clinical utility of the recommendations, and the degree to which the recommendations are consistent with the content reviewers' interpretation of the available data on the topic in question. This form was adapted by ASCO from the Cancer Care Ontario Program in Evidence-based Care Practitioner Feedback instrument. The methodological review is completed by a member of the CPGC's Methodology Subcommittee and/or by ASCO guidelines staff using the Rigour of Development subscale of the Appraisal of Guidelines for Research and Evaluation II (AGREE II) instrument ([www.agreetrust.org](http://www.agreetrust.org)). The Rigour subscale consists of seven items that assess the quality of the processes used to gather and synthesize the relevant data, and the methods used to formulate the guideline recommendations (Figure 4: Rigour of Development Subscale of the Appraisal of Guidelines for Research and Evaluation II Instrument). In addition to this methodological review, ASCO staff conducts literature searches to identify relevant studies and additional systematic reviews, meta-analyses, and guidelines that have been published since the guideline under endorsement was completed. Final review and approval is completed by the ASCO CPGC after approval by the ASCO Endorsement Panel.

#### 4. OVERVIEW OF THE GUIDELINE ADAPTATION PROCESS

ASCO's adapted guidelines are informed by the ADAPTE methodology (the ADAPTE process: Resource toolkit for guideline adaptation, version 2.0.; <http://www.g-i-n.net>). The objective of the ADAPTE process (<http://www.adapte.org/>) is to take advantage of existing guidelines in order to enhance efficient production, reduce duplication, and promote the local uptake of quality guideline recommendations. ASCO's adaptation process begins with a literature search to identify candidate guidelines for adaptation.

Adapted guideline manuscripts are reviewed and approved by the ASCO Clinical Practice Guidelines Committee (CPGC). The review includes two parts: methodological review and content review. The methodological review is completed by a member of the CPGC's Methodology Subcommittee and/or by ASCO guidelines staff using the Rigour of Development subscale of the Appraisal of Guidelines for Research and Evaluation II (AGREE II) instrument (Figure 4). The Rigour subscale consists of seven items that assess the quality of the processes used to gather and synthesize the relevant data, and the methods used to formulate the guideline recommendations. In addition to this methodological review, ASCO staff conducts literature searches to identify relevant studies and additional systematic reviews, meta-analyses, and guidelines that have been published since the guideline being adapted was completed.

The content review is completed by an Adaptation Panel convened by ASCO that includes multidisciplinary representation. The Panel members are asked to complete an eight item Guideline Endorsement Content Review Form (Figure 3) that assesses the perceived clarity and clinical utility of the recommendations, and the degree to which the recommendations are consistent with the content reviewers' interpretation of the available data on the topic in question. This form was adapted by ASCO from the Cancer Care Ontario Program in Evidence-based Care Practitioner Feedback instrument.

The Adaptation Panel is led by two Co-Chairs who have the primary responsibility for the development and timely completion of the guideline adaptation. Recommendations from the source guidelines are extracted into a summary matrix. Final review and approval are completed by the ASCO CPGC after approval by the ASCO Adaptation Panel.

As mentioned, the adaptation process starts with a literature search to identify candidate guidelines for adaptation on a given topic. A systematic search of clinical practice guideline databases, guideline developer Web sites, and the published health literature is conducted to identify clinical practice guidelines, systematic reviews, meta-analyses, and other guidance documents addressing the given topic area. The literature search includes MEDLINE and EMBASE databases, and the Cochrane Library. To identify guidelines not indexed in medical databases, an environmental scan is undertaken of guideline databases. Finally, Web sites of organizations developing guidelines and medical specialty websites are searched and a Google™ search is undertaken to ensure that no guidelines were missed.

Guidelines and reviews based on a clearly described systematic literature search are preferred; however, expert consensus guidance is also included for consideration. Narrative reviews and abstracts are excluded.

## 5. OVERVIEW OF THE PROVISIONAL CLINICAL OPINION (PCO) PROCESS

The ASCO Clinical Practice Guidelines Committee (CPGC) leadership is responsible for accepting, reviewing, and approving proposed PCO topics on behalf of the ASCO Board of Directors. The selection of a PCO topic is guided by the Topic Selection Algorithm that is used by the CPGC to guide selection of topics for ASCO's clinical practice guidelines ([www.asco.org/guidelines/manual](http://www.asco.org/guidelines/manual)).

PCO's are informed by expeditious methodological assessments of the data in question or by using an existing systematic review conducted by an entity that produces evidence-based guidelines.

The PCO Panel includes six content experts and a patient representative. The membership of the PCO Panel is chosen in accordance with ASCO's Conflicts of Interest Management Procedures for Clinical Practice. The COI Procedures call for the majority of PCO Panel members to have no relationships with companies potentially affected by the PCO, and generally require PCO Panel co-chairs to be free from relationships with affected companies.

The PCO is approved by a unanimous vote of (1) the PCO Panel members; (2) the CPGC leadership (Past-Chair, Chair, Chair-Elect, and ASCO Board Liaison) and selected content experts drawn from the CPGC membership and/or selected content experts appointed at the discretion of the CPGC Chair.

**Figure 1: Sample Expert Content Review Matrix for Guideline Updating Assessment (adapted from the 2013 AHRQ report, Surveillance and Identification of Signals for Updating Systematic Reviews: Implementation and Early Experience<sup>2</sup>)**

| Recommendation from ASCO Guideline | Is this recommendation almost certainly still supported by the evidence? | Has there been new evidence that may change the recommendation? | Do not know              |
|------------------------------------|--------------------------------------------------------------------------|-----------------------------------------------------------------|--------------------------|
| Clinical Question 1:               |                                                                          |                                                                 |                          |
| Recommendation:                    | <input type="checkbox"/>                                                 | New Evidence:                                                   | <input type="checkbox"/> |
| Clinical Question 2:               |                                                                          |                                                                 |                          |
| Recommendation:                    | <input type="checkbox"/>                                                 | New Evidence:                                                   | <input type="checkbox"/> |

**Figure 2: Sample Summary Table for ASCO Guideline Updating Needs Assessment  
(adapted from the 2013 AHRQ report, Surveillance and Identification of Signals for Updating Systematic Reviews: Implementation and Early Experience<sup>2</sup>)**

| Conclusions from ASCO Guideline | Literature search yield | FDA Surveillance Alert | Expert opinion assessment | Conclusions from ASCO Panel Co-Chairs |
|---------------------------------|-------------------------|------------------------|---------------------------|---------------------------------------|
| Clinical Question 1:            |                         |                        |                           |                                       |
| Recommendation:                 |                         |                        |                           |                                       |
| Clinical Question 2:            |                         |                        |                           |                                       |
| Recommendation:                 |                         |                        |                           |                                       |

**Figure 3: ASCO Guideline Endorsement Content Review Form**

American Society of Clinical Oncology  
Practice Guideline Endorsement Content Review Form\*

**Guideline Title:** \_\_\_\_\_

**Organization:** \_\_\_\_\_

**Reviewer Name:** \_\_\_\_\_

**Background and Instructions.** ASCO considers clinical practice guidelines developed by other professional organizations for endorsement. This is done by ASCO most often in lieu of undertaking its own guideline on the same topic. You have been asked to provide a content review of a guideline that is under consideration for endorsement by ASCO. Please check the box that best applies for each of the following items.

|                                                                                                                   | Strongly Agree           | Agree                    | Neither Agree or Disagree | Disagree                 | Strongly Disagree        | Unsure                   |
|-------------------------------------------------------------------------------------------------------------------|--------------------------|--------------------------|---------------------------|--------------------------|--------------------------|--------------------------|
| The results of the studies described in this guideline are interpreted according to my understanding of the data. | <input type="checkbox"/> | <input type="checkbox"/> | <input type="checkbox"/>  | <input type="checkbox"/> | <input type="checkbox"/> | <input type="checkbox"/> |
| The recommendations in this report are clear.                                                                     | <input type="checkbox"/> | <input type="checkbox"/> | <input type="checkbox"/>  | <input type="checkbox"/> | <input type="checkbox"/> | <input type="checkbox"/> |
| I agree with the recommendations as stated in the guideline.                                                      | <input type="checkbox"/> | <input type="checkbox"/> | <input type="checkbox"/>  | <input type="checkbox"/> | <input type="checkbox"/> | <input type="checkbox"/> |
| The recommendations are suitable for the patients for whom they are intended.                                     | <input type="checkbox"/> | <input type="checkbox"/> | <input type="checkbox"/>  | <input type="checkbox"/> | <input type="checkbox"/> | <input type="checkbox"/> |
| The recommendations are too rigid to apply to individual patients.                                                | <input type="checkbox"/> | <input type="checkbox"/> | <input type="checkbox"/>  | <input type="checkbox"/> | <input type="checkbox"/> | <input type="checkbox"/> |
| When applied, the recommendations will produce more benefits for patients than harms.                             | <input type="checkbox"/> | <input type="checkbox"/> | <input type="checkbox"/>  | <input type="checkbox"/> | <input type="checkbox"/> | <input type="checkbox"/> |
| The guideline presents options that will be acceptable to patients.                                               | <input type="checkbox"/> | <input type="checkbox"/> | <input type="checkbox"/>  | <input type="checkbox"/> | <input type="checkbox"/> | <input type="checkbox"/> |
| The guideline should be endorsed by ASCO.                                                                         | <input type="checkbox"/> | <input type="checkbox"/> | <input type="checkbox"/>  | <input type="checkbox"/> | <input type="checkbox"/> | <input type="checkbox"/> |

\* This form was adapted from the Cancer Care Ontario Program in Evidence-Based Care Practitioner Feedback instrument.



## Figure 4: Rigour of Development Subscale of the Appraisal of Guidelines for Research and Evaluation II Instrument

### Rigour of Development Subscale Item

Systematic methods were used to search for evidence.

The criteria for selecting the evidence are clearly described.

The strengths and limitations of the body of evidence are clearly described.

The methods used for formulating the recommendations are clearly described.

The health benefits, side effects, and risks have been considered in formulating the recommendations.

There is an explicit link between the recommendations and the supporting evidence.

The guideline has been externally reviewed by experts prior to its publication.

A procedure for updating the guideline is provided.

NOTE: Each subscale item is rated on a seven-point scale from 1 (strongly disagree) to 7 (strongly agree). The score for the Rigour of Development domain is calculated by summing the scores across individual items in the domain and across all raters, subtracting the lowest possible score for that domain ( $1 \times \text{No. items} \times \text{No. of raters}$ ), then standardizing the total score as a proportion of the maximum possible score ( $7 \times \text{No. of items} \times \text{No. of raters}$ ) minus the lowest possible score

## References

1. Shiffman RN, Michel G, Rosenfeld RM, et al: Building better guidelines with BRIDGE-Wiz: development and evaluation of a software assistant to promote clarity, transparency, and implementability. *J Am Med Inform Assoc* 19:94-101, 2012
2. Newberry SJ, Ahmadzai N, Motala A, et al: *Surveillance and Identification of Signals for Updating Systematic Reviews: Implementation and Early Experience*. Rockville MD, 2013
